# Supplementary material
Source: PubMed Central journal article supplement (PMC4241450)
Supplement: mmc2.pdf [file mmc2.pdf]

## Article

# Fibroblast Electrical Remodeling in Heart Failure and Potential Effects on Atrial Fibrillation

Martin Aguilar,<sup>1,2,5</sup> Xiao Yan Qi,<sup>1</sup> Hai Huang,<sup>1</sup> and Stanley Nattel<sup>1,3,4,\*</sup>

<sup>1</sup>Research Center, Montreal Heart Institute, Montreal, Canada; <sup>2</sup>Department of Physiology, <sup>3</sup>Institute of Biomedical Engineering, and <sup>4</sup>Department of Medicine, Université de Montréal, Montreal, Canada; and <sup>5</sup>Departments of Pharmacology, Therapeutics and Medicine, McGill University, Montreal, Canada

**ABSTRACT** Fibroblasts are activated in heart failure (HF) and produce fibrosis, which plays a role in maintaining atrial fibrillation (AF). The effect of HF on fibroblast ion currents and its potential role in AF are unknown. Here, we used a patch-clamp technique to investigate the effects of HF on atrial fibroblast ion currents, and mathematical computation to assess the potential impact of this remodeling on atrial electrophysiology and arrhythmogenesis. Atrial fibroblasts were isolated from control and tachypacing-induced HF dogs. Tetraethylammonium-sensitive voltage-gated fibroblast current ( $I_{Kv,fb}$ ) was significantly downregulated (by ~44%), whereas the  $Ba^{2+}$ -sensitive inward rectifier current ( $I_{Kir,fb}$ ) was upregulated by 79%, in HF animals versus controls. The fibroblast resting membrane potential was hyperpolarized ( $-53 \pm 2$  mV vs.  $-42 \pm 2$  mV in controls) and the capacitance was increased ( $29.7 \pm 2.2$  pF vs.  $17.8 \pm 1.4$  pF in controls) in HF. These experimental findings were implemented in a mathematical model that included cardiomyocyte-fibroblast electrical coupling.  $I_{Kir,fb}$  upregulation had a profibrillatory effect through shortening of the action potential duration and hyperpolarization of the cardiomyocyte resting membrane potential.  $I_{Kv,fb}$  downregulation had the opposite electrophysiological effects and was antifibrillatory. Simulated pharmacological blockade of  $I_{Kv,fb}$  successfully terminated reentry under otherwise profibrillatory conditions. We conclude that HF induces fibroblast ion-current remodeling with  $I_{Kv,fb}$  downregulation and  $I_{Kir,fb}$  upregulation, and that, assuming cardiomyocyte-fibroblast electrical coupling, this remodeling has a potentially important effect on atrial electrophysiology and arrhythmogenesis, with the overall response depending on the balance of pro- and antifibrillatory contributions. These findings suggest that fibroblast  $K^+$ -current remodeling is a novel component of AF-related remodeling that might contribute to arrhythmia dynamics.

## INTRODUCTION

Atrial fibrillation (AF) is the most common sustained arrhythmia in the general population and is associated with significant cardiovascular morbidity and mortality (1,2). The failure of randomized clinical trials to demonstrate a benefit from sinus-rhythm-maintaining antiarrhythmic therapy, which has often been attributed to the suboptimal efficacy and significant proarrhythmic potential of antiarrhythmic drugs (3), highlights our incomplete understanding of the basic pathophysiology of AF.

At the cellular level, it is well known that AF induces cardiomyocyte electrical remodeling and atrial fibrosis, forming the basis for longer-lasting forms of AF (4–7). Traditionally, fibroblasts were thought to be relevant to arrhythmogenesis primarily because they produce extracellular matrix, which serves as a structural barrier that affects anisotropic conduction and creates conduction block (8–11). However, recent work has modified this paradigm by suggesting that cardiac fibroblasts may couple electrically to atrial cardiomyocytes and modulate their electro-

physiological properties to promote various forms of arrhythmogenesis (12). Cardiomyocyte-fibroblast electrical interactions have been studied in cocultured cell systems (13–18) and mathematical models (19,20), and postulated to contribute to the pathogenesis of AF (12,19), although in vivo evidence of such interactions is lacking. Cardiomyocyte ion-channel remodeling is known to play an important role in AF pathophysiology (21). Fibroblasts also possess ion channels, but their function is much less well understood than those of cardiomyocytes (12). The nature and potential significance of fibroblast ion-channel remodeling associated with AF remain to be evaluated. Here, we examined the remodeling of  $K^+$  currents in fibroblasts freshly isolated from dogs with an AF substrate associated with heart failure (HF). Freshly isolated fibroblasts were used to preclude the effects of cell culture, which can obscure the fibroblast remodeling phenotype caused by HF (22). We then implemented these experimental findings in a mathematical model based on previous work (23) to investigate the potential effects of fibroblast electrical remodeling on atrial cardiomyocyte electrophysiological properties and arrhythmogenesis, assuming cardiomyocyte-fibroblast electrical coupling.

Submitted June 16, 2014, and accepted for publication October 8, 2014.

\*Correspondence: stanley.nattel@icm-mhi.org

Philippe Comtois and Stanley Nattel contributed equally to this work.

Editor: Randall Rasmusson.

© 2014 by the Biophysical Society  
0006-3495/14/11/2444/12 \$2.00

<http://dx.doi.org/10.1016/j.bpj.2014.10.014>

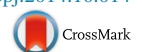

## MATERIALS AND METHODS

### Animal model

Animal care procedures were approved by the Animal Research Ethics Committee of the Montreal Heart Institute and followed National Institutes of Health guidelines. We studied a total of 20 adult mongrel dogs (20–30 kg), divided into control (CTL;  $n = 10$ ) and 2-week ventricular tachypacing-induced HF ( $n = 10$ ) groups. HF dogs were anesthetized under diazepam (0.25 mg/kg IV)/ketamine (5.0 mg/kg IV)/halothane (1–2% PI) anesthesia so that two leads could be inserted under fluoroscopy into the right ventricular apex (via the left jugular vein) and connected to a pacemaker (St. Jude Medical, St. Paul, MN) implanted subcutaneously in the neck. After 24 h of postoperative recovery, ventricular pacing was initiated at 240 bpm for 2 weeks. On study days, the dogs were anesthetized with morphine (2 mg/kg SC) and  $\alpha$ -chloralose (120 mg/kg IV, followed by 29.25 mg/kg/h) and ventilated mechanically. The atrial effective refractory period (aERP) and mean AF duration were measured at basic cycle lengths (BCLs) of 150, 200 ms, 250 ms, 300 ms, and 350 ms in the right atrium. aERP was determined with 10 basic stimuli (S1) followed by a premature extrastimulus (S2) in 5 ms decrements (the longest S1-S2 interval that failed to capture defined the aERP). The mean of three aERP values at each BCL was used for analysis. AF was induced with atrial burst pacing at 10 Hz and 10 V. The mean AF duration was based on 10 AF inductions in each dog. If the mean duration of the first five episodes of AF was longer than 2 min, AF was only induced five times. After in vivo study, the hearts were removed and immediately immersed in oxygenated Tyrode solution containing (mmol/L) NaCl 136, KCl 5.4, MgCl<sub>2</sub> 1, CaCl<sub>2</sub> 2, NaH<sub>2</sub>PO<sub>4</sub> 0.33, HEPES 5, and dextrose 10, pH 7.35 (NaOH). Atrial tissue was subjected to enzymatic digestion as described below for cell isolation.

### Fibroblast isolation

Atrial fibroblasts were obtained from the left atria of adult mongrel dogs as described previously (24). The heart was removed after intra-atrial injection of heparin (10,000 U) and immersed in Tyrode solution containing 2 mmol/L Ca<sup>2+</sup>, and the left coronary artery was cannulated. The left atrial (LA) tissue was then perfused with 2 mmol/L Tyrode solution (37°C, 100% O<sub>2</sub>), then with Ca<sup>2+</sup>-free Tyrode solution (~10 min), and finally by ~60 min perfusion with the same solution containing collagenase II (~0.48 mg/mL; Worthington, Lakewood, NJ) and 0.1% bovine serum albumin (BSA; Sigma, Sigma-Aldrich Canada Co., Oakville, Ontario, Canada). Cells were dispersed by trituration in Kraftbrühe (KB) solution (for contents, see below). Filtration (500  $\mu$ m micromesh) was used to remove debris and cells were centrifuged at 800 rpm for 5 min to pellet cardiomyocytes. The supernatant was collected and filtered through 30  $\mu$ m nanomesh and centrifuged at 1500 rpm for 10 min to pellet fibroblasts. Pelleted, freshly isolated fibroblasts were then separated.

### Ion current and membrane potential recording

All in vitro recordings were obtained at 37°C. The whole-cell perforated-patch technique was used to record resting membrane potentials (RMPs) in current-clamp mode and the tight-seal patch clamp was used to record K<sup>+</sup> current in voltage-clamp mode. Borosilicate glass electrodes (Sutter Instrument) filled with pipette solution were connected to a patch-clamp amplifier (Axopatch 200A; Axon). Electrodes had tip resistances of 6–8 M $\Omega$ . For perforated-patch formation, a nystatin-free intracellular solution was in the tip of the pipette by capillary action (~30 s). The pipettes were then back-filled with a nystatin-containing (600  $\mu$ g/mL) pipette solution. Currents are expressed as averages (pA/pF). Junction potentials between bath and pipette solutions averaged 10.5 mV and were corrected for RMP measurements only. I<sub>Kir,fb</sub> was quantified as 300  $\mu$ mol/L

Ba<sup>2+</sup>-sensitive current. I<sub>Kv,fb</sub> was quantified as current sensitive to 10 mmol/L tetraethylammonium (TEA) (24). The bath solution contained (mmol/L) NaCl 136, CaCl<sub>2</sub> 1.8, KCl 5.4, MgCl<sub>2</sub> 1, NaH<sub>2</sub>PO<sub>4</sub> 0.33, dextrose 10, and HEPES 5, titrated to pH 7.3 with NaOH. The pipette solution contained (mmol/L) GTP 0.1, potassium-aspartate 110, KCl 20, MgCl<sub>2</sub> 1, MgATP 5, HEPES 10, sodium-phosphocreatine 5, and EGTA 0.005 (pH 7.4, KOH). The KB solution contained (mmol/L) KCl 20, KH<sub>2</sub>PO<sub>4</sub> 10, dextrose 10, mannitol 40, L-glutamic acid 70,  $\beta$ -OH-butyric acid 10, taurine 20, EGTA 10, and 0.1% BSA (pH 7.3, KOH).

### Atrial cardiomyocyte and fibroblast mathematical models

The Ramirez-Nattel-Courtemanche (RNC) ionic model of canine atrial cardiomyocyte action potentials (APs) (25) was implemented and electrically connected to a variable number ( $n$ ) of MacCannell model fibroblasts (20) via gap junctions of conductance G<sub>gap</sub>. The total ionic current for the RNC model (I<sub>ion,RNC</sub>) is

$$I_{ion,RNC} = I_{Na} + I_{Kir} + I_{to} + I_{Kur,d} + I_{Kr} + I_{Ks} + I_{CaL} + I_{ClCa} + I_{KACH} + I_{pCa} + I_{NaCa} + I_{NaK} + I_{b,Na} + I_{b,Ca} + I_{b,Cl} + nI_{gap}$$

where I<sub>Kir</sub>, I<sub>to</sub>, I<sub>Kur,d</sub>, I<sub>Kr</sub>, I<sub>Ks</sub>, and I<sub>KACH</sub> are the inward-rectifier-, transient-outward-, ultrarapid delayed-rectifier-, rapid and slow delayed rectifier-, and acetylcholine (ACh)-activated K<sup>+</sup> currents respectively; I<sub>CaL</sub> is the L-type Ca<sup>2+</sup> current; I<sub>ClCa</sub> is the Ca<sup>2+</sup>-activated Cl<sup>-</sup> current; I<sub>pCa</sub> is the Ca<sup>2+</sup> pump current; I<sub>NaCa</sub> is the Na<sup>+</sup>/Ca<sup>2+</sup> exchange current; I<sub>NaK</sub> is the Na<sup>+</sup>/K<sup>+</sup> pump current; and I<sub>b,Na</sub>, I<sub>b,Ca</sub>, and I<sub>b,Cl</sub> are the background Na<sup>+</sup>, Ca<sup>2+</sup>, and Cl<sup>-</sup> currents, respectively (26). I<sub>gap</sub> is the gap-junction current and  $n$  is the number of fibroblasts coupled to each cardiomyocyte. The total ionic current for the MacCannell fibroblast model (I<sub>ion,fb</sub>) is calculated as

$$I_{ion,fb} = I_{Kv,fb} + I_{Kir,fb} + I_{NaK,fb} + I_{b,Na,fb} - I_{gap}$$

where I<sub>Kv,fb</sub> and I<sub>Kir,fb</sub> are the fibroblast-delayed-rectifier and inward-rectifier K<sup>+</sup> currents, respectively, I<sub>NaK,fb</sub> is the Na<sup>+</sup>/K<sup>+</sup> exchange pump current, I<sub>b,Na,fb</sub> is the background Na<sup>+</sup> current, and I<sub>gap</sub> is the gap junction current (20).

Fibroblast electrical remodeling was simulated by scaling the fibroblast I<sub>Kv,fb</sub> and I<sub>Kir,fb</sub> maximal conductance as follows: G<sub>Kir,fb</sub>' = f<sub>Kir,fb</sub> × G<sub>Kir,fb</sub> and G<sub>Kv,fb</sub>' = f<sub>Kv,fb</sub> × G<sub>Kv,fb</sub>, where G<sub>x</sub> is the baseline conductance, f<sub>x</sub> is the remodeling factor, and G<sub>x</sub>' is the remodeled conductance. G<sub>Kir,fb</sub> and G<sub>Kv,fb</sub> were set at 0.4822 nS/pF and 0.14 nS/pF, respectively, as described by Ashihara et al. (23). We varied f<sub>Kir,fb</sub> and f<sub>Kv,fb</sub> independently with f<sub>Kir,fb</sub> = {1, 2.5, 5, 10} and f<sub>Kv,fb</sub> = {0.1, 0.25, 0.5, 0.75, 1}.

### Single-cell and cable simulations

A single cardiomyocyte with capacitance 100 pF (25) was connected to a fibroblast through a gap junction with a gap-junction conductivity (G<sub>gap</sub>) of 3 nS. The cardiomyocyte was paced at a BCL of 250 ms and the cardiomyocyte transmembrane potential, fibroblast transmembrane potential, gap-junction current (I<sub>gap</sub>), and total fibroblast potassium current (I<sub>K,fb</sub>) were monitored under CTL and remodeled conditions. We then constructed a 1D monodomain cable of atrial cardiomyocytes connected to fibroblasts and simulated cardiomyocyte and fibroblast transmembrane potential, I<sub>gap</sub>, I<sub>K,fb</sub>, and relevant electrophysiological parameters under CTL and remodeled conditions. Numerical integration of the single-cell model was performed using the MATLAB ODE23s ordinary differential equation solver (The MathWorks, Natick, MA).

## 2D sheet and fibroblast distribution

We performed 2D simulations on a  $5 \times 10$  cm sheet of RNC atrial cells. The tissue contained cardiomyocyte cables (radius  $5 \mu\text{m}$ , resistivity  $75 \Omega\text{-cm}$ , coupled by resistors of  $300 \text{ k}\Omega$  (length  $100 \text{ mm}$ ) inserted in a brick-wall manner). Fiber resistivity and interfiber resistance values were chosen to match experimental results (26,27). Fig. S1 in the Supporting Material shows the fibroblast distribution used (the results presented here were obtained at intermediate density (0.250), but analyses were conducted with all three fibroblast distribution maps and produced qualitatively similar results). Fibroblast proliferation was generated through a recursive algorithm as described by Ashihara et al. (23). Reentrant spiral waves were initiated using an S1-S2 cross-shock protocol. We investigated the initiation, maintenance, and termination dynamics, and performed a dominant-frequency analysis by computing the frequency domain amplitude of the fast Fourier transform of the pseudo-ECG, as in previous work (28). Both the cable and 2D models were coded in C and calculations were performed with a time step of  $25 \mu\text{s}$  using up to eight processors with an SGI Altix XE high-performance parallel processor (Westgrid).

## RESULTS

### In vivo measurements

In vivo electrophysiological data and hemodynamic indices are shown in Fig. 1. HF significantly increased aERP at all BCLs (Fig. 1 A). Mean AF duration increased in HF dogs ( $745 \pm 287$  vs.  $22 \pm 10$  s in CTL; Fig. 1 B). Systolic and diastolic pressures were reduced in HF dogs, whereas left ventricular (LV) end-diastolic, LA, and right atrial

(RA) pressures were increased (Fig. 1, C–E), consistent with the HF phenotype.

### Fibroblast Kv and Kir current remodeling in AF

Time- and voltage-dependent  $\text{K}^+$  current ( $I_{\text{Kv,fb}}$ ) was elicited by 500 ms voltage-clamp steps to voltages ranging from  $-110$  to  $+70$  mV.  $I_{\text{Kv,fb}}$  activated rapidly and showed little inactivation, and was reversibly suppressed by  $30 \text{ mmol/L}$  TEA (Fig. 2, A and B). HF strongly downregulated the TEA-sensitive  $\text{K}^+$  current (Fig. 2 B). Mean current density-voltage relations (Fig. 2 C) showed statistically significant decreases in  $I_{\text{Kv,fb}}$  (by  $\sim 70\%$ ) in HF fibroblasts over a wide range of voltages. LA fibroblasts had membrane capacitances of  $17.8 \pm 1.4$  ( $n = 33$ ) and  $29.7 \pm 2.2$  ( $n = 33$ ,  $p < 0.001$  versus CTL) pF in CTL and HF, respectively (Fig. 2 D).

Kir currents ( $I_{\text{Kir,fb}}$ ) recorded from CTL and HF atrial fibroblasts are shown in Fig. 3 A. Current induced with a ramp depolarization at baseline before  $\text{Ba}^{2+}$  and current in the presence of  $300 \mu\text{mol/L}$   $\text{Ba}^{2+}$  are shown for individual cells obtained for each condition. Fig. 3 B shows the mean density of  $I_{\text{Kir,fb}}$  as a function of test voltage. At  $-120$  mV,  $I_{\text{Kir,fb}}$  averaged  $-1.4 \pm 0.6$  in CTL ( $n = 15$ ) and  $-2.6 \pm 0.3$  ( $n = 10$ ) pA/pF in HF fibroblasts, an 86% increase ( $p < 0.001$ ). Consistent with inward-rectifier current upregulation in HF, RMP averaged  $-42 \pm 2$  mV in CTL ( $n = 16$ ) and  $-53 \pm 2$  mV in HF ( $n = 19$ ,  $p < 0.01$  versus CTL) fibroblasts (Fig. 3 C).

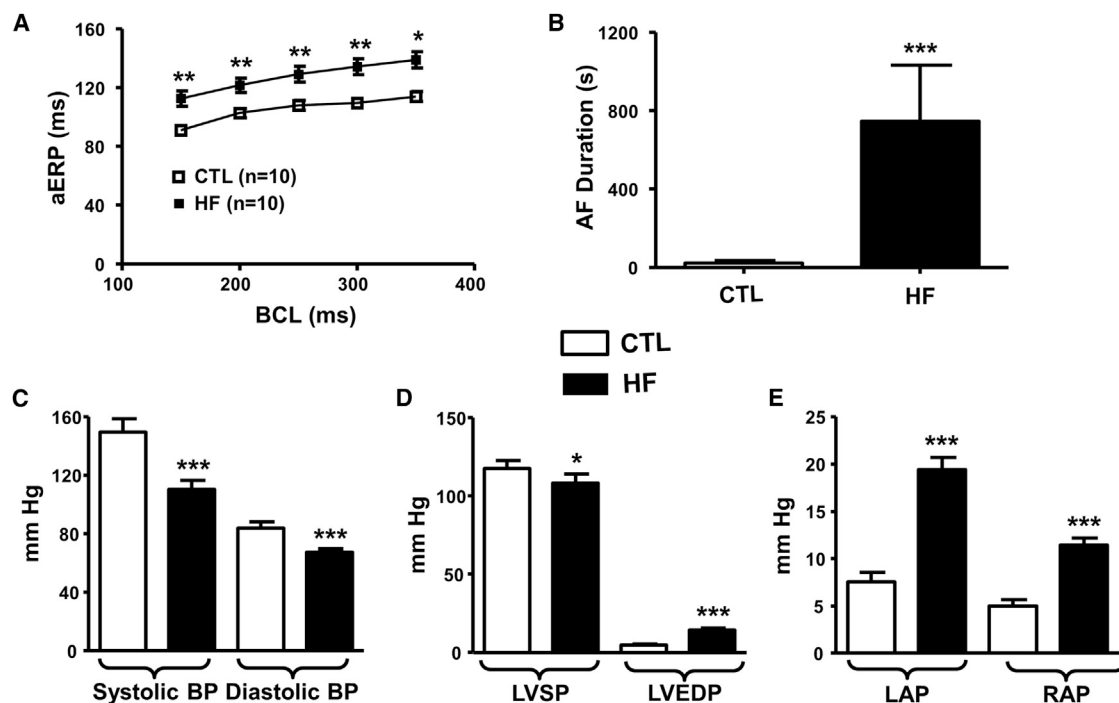

FIGURE 1 In vivo electrophysiological data and hemodynamic indices. (A) Atrial effective refractory period (aERP) as a function of basic cycle length (BCL). (B) AF duration. (C) Arterial blood pressure. (D) Left ventricular systolic pressure (LVSP) and end-diastolic pressure (LVEDP). (E) Left atrial pressure (LAP) and right atrial pressure (RAP). \* $p < 0.05$ , \*\* $p < 0.01$ , \*\*\* $p < 0.001$  versus CTL.

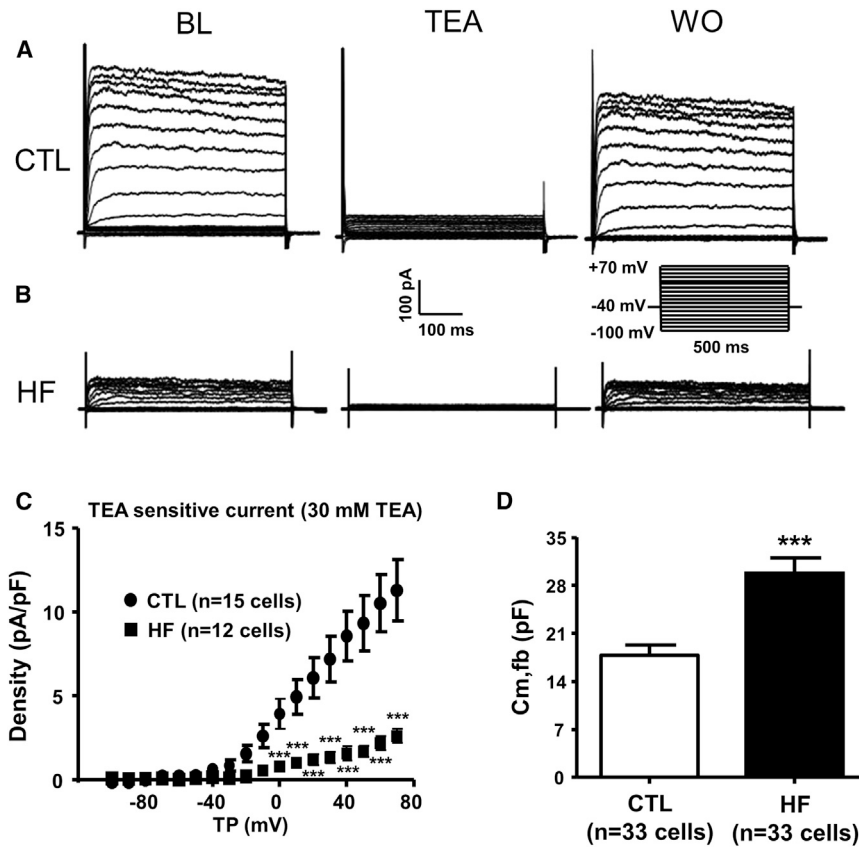

FIGURE 2 Experimental recordings of the TEA-sensitive current ( $I_{Kv,fb}$ ). (A) Current densities at baseline (BL), after 30 mM TEA, and upon washout (WO) in a CTL atrial fibroblast (voltage protocol in *inset*). (B) Same as A, but for HF cells. (C) TEA-sensitive current density as a function of test potential (TP). (D) Fibroblast membrane capacitance ( $C_{m,fb}$ ). Results are mean  $\pm$  SEM. \*\*\* $p < 0.001$  versus CTL.

**Effects of fibroblast electrical remodeling on the atrial cardiomyocyte AP**

Fig. 4 shows the model-simulated cardiomyocyte transmembrane potential ( $V_m$ ; Fig. 4 A), fibroblast transmembrane potential ( $V_{m,fb}$ ; Fig. 4 B), gap-junction current

( $I_{gap}$ ; Fig. 4 C) and total fibroblast  $K^+$  current ( $I_{K,fb}$ ; Fig. 4 D), with progressive  $I_{Kv,fb}$  downregulation for a cardiomyocyte paced at 4 Hz coupled to two fibroblasts by a gap-junction conductivity of 3 nS. Downregulation of fibroblast  $I_{Kv,fb}$  decreased the total fibroblast  $K^+$  current (Fig. 4 D), reducing

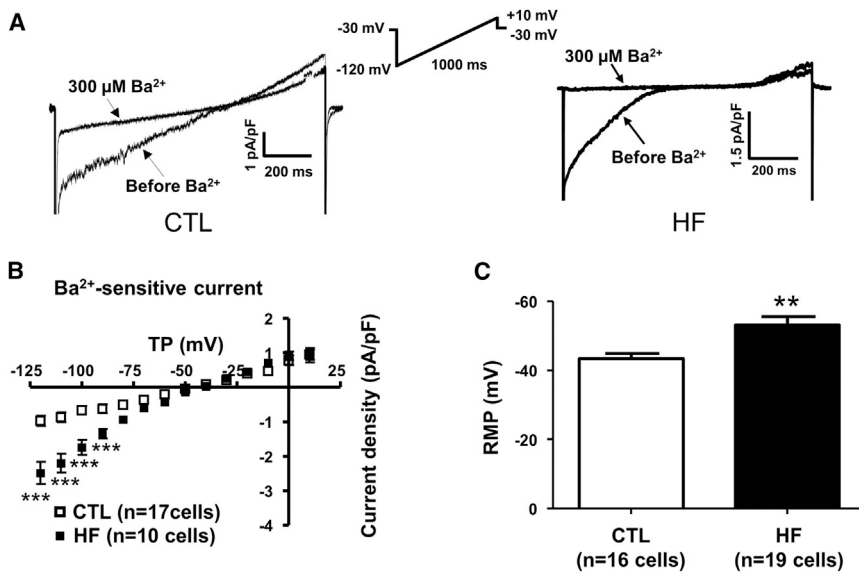

FIGURE 3 Experimental recordings for Kir current ( $I_{Kir,fb}$ ). (A) Current densities for CTL (*left*) and HF (*right*) obtained with a ramp protocol before and after addition of 300  $\mu$ M  $Ba^{2+}$ . (B) Current densities as a function of TP. (C) Resting membrane potential (RMP). Results are mean  $\pm$  SEM. \*\* $p < 0.01$ , \*\*\* $p < 0.001$  versus CTL.

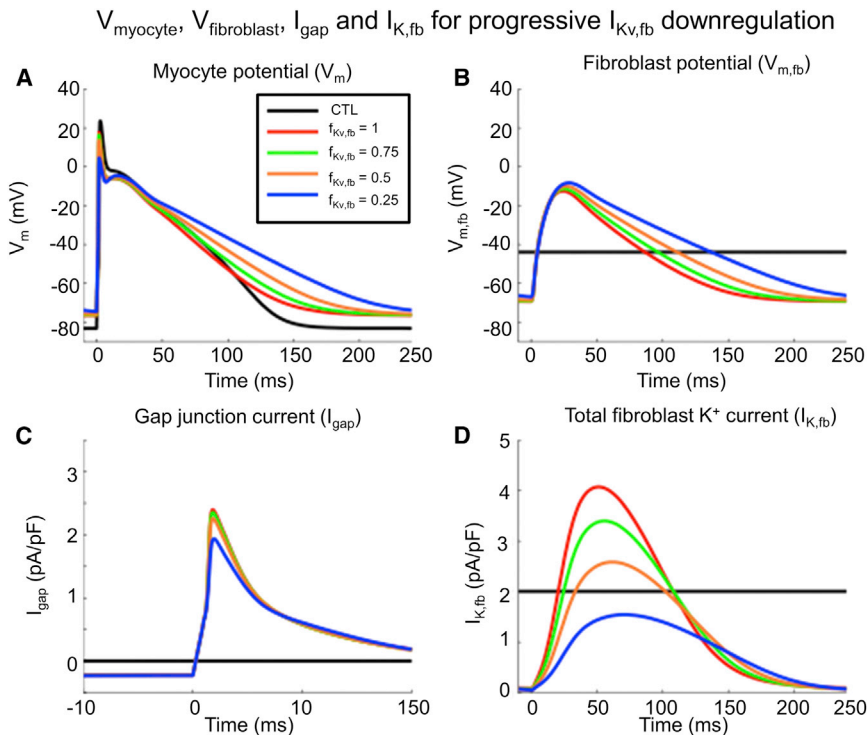

FIGURE 4 (A–D) Effect of fibroblast  $I_{Kv,\text{fb}}$  downregulation on (A) cardiomyocyte transmembrane potential ( $V_m$ ), (B) fibroblast transmembrane potential ( $V_{m,\text{fb}}$ ), (C) gap-junction current ( $I_{\text{gap}}$ ), and (D) total fibroblast  $K^+$  current ( $I_{K,\text{fb}}$ ). Progressive  $I_{Kv,\text{fb}}$  downregulation decreased the fibroblast repolarizing  $K^+$  current density, making the fibroblast behave as a current source during phases 2 and 3 of the cardiomyocyte AP, leading to APD prolongation. The cardiomyocyte RMP was depolarized by  $I_{Kv,\text{fb}}$  downregulation, leading to partial  $I_{Na}$  inactivation. Results were obtained with two fibroblasts connected to a cardiomyocyte paced at 4 Hz with a  $G_{\text{gap}}$  of 3 nS. CTL = single-cardiomyocyte action potential in the absence of fibroblast coupling. To see this figure in color, go online.

the fibroblast repolarizing current. This had the effect of increasing the gap-junction current flow from the fibroblast to the cardiomyocyte during phases 2 and 3 of the cardiomyocyte AP (Fig. 4 C), thereby making the fibroblast a source of depolarizing current. This depolarizing current led to progressive cardiomyocyte APD prolongation (Fig. 4 A).  $I_{Kv,\text{fb}}$  downregulation also had a depolarizing effect on the cardiomyocyte RMP.

Fig. 5, A–D, show the same variables as in Fig. 4, but for graded  $I_{Kir,\text{fb}}$  upregulation. Upregulation of  $I_{Kir,\text{fb}}$  progressively increased the total fibroblast  $K^+$  current (Fig. 5 D), thus increasing the fibroblast repolarizing current. This effect increased the gap-junction current from the cardiomyocyte to the fibroblast, thereby making the fibroblast a current sink for the cardiomyocyte and shortening the cardiomyocyte APD (Fig. 5 A).  $I_{Kir,\text{fb}}$  upregulation also had a hyperpolarizing effect on the RMP, helping to maintain  $Na^+$  current availability during phase 0 of the AP.

### Graded effects of fibroblast electrical remodeling on atrial tissue RMP, $APD_{90}$ , and conduction velocity

We determined the effects of fibroblast ion-current remodeling on cardiomyocyte cellular electrical properties by simulating activation of a cable over a wide range of pacing frequencies to vary the diastolic interval (DI). Fig. S2 shows the RMP (Fig. S2 A), AP duration (APD)

at 90% repolarization ( $APD_{90}$ ; Fig. S2 B), and conduction velocity (CV; Fig. S2 C) as a function of DI for  $I_{Kv,\text{fb}}$  downregulation (red) and  $I_{Kir,\text{fb}}$  upregulation (green) over a 10 cm cable with two fibroblasts per cardiomyocyte and a  $G_{\text{gap}}$  of 3 nS.  $I_{Kv,\text{fb}}$  downregulation had a small depolarizing effect on the cardiomyocyte RMP but substantially prolonged APD compared with CTL (e.g.,  $APD_{90}$  values at BCL = 500 ms for  $f_{Kv,\text{fb}} = 1.0, 0.75, 0.5,$  and  $0.25$  were 162 ms, 175 ms, 194 ms, and 225 ms, respectively; RMP values were  $-76.9$  mV,  $-76.8$  mV,  $-76.6$  mV, and  $-76.4$  mV, respectively). Conduction velocities paralleled the conduction velocities for the CTL condition over the spectrum of  $f_{Kv,\text{fb}}$  under investigation.

$I_{Kir,\text{fb}}$  upregulation had the opposite effect on repolarization and resting potentials, i.e., it significantly hyperpolarized the cardiomyocyte RMP and shortened the  $APD_{90}$  versus CTL ( $APD_{90}$  values at BCL = 500 ms for  $f_{Kir,\text{fb}} = 1.0, 2.5, 5.0,$  and  $10$  were 162 ms, 152 ms, 137 ms, and 115 ms, respectively, with corresponding RMP values of  $-76.9$  mV,  $-78.22$  mV,  $-79.7$  mV, and  $-81.2$  mV, respectively).  $I_{Kir,\text{fb}}$  upregulation reduced CVs at long DIs compared with CTL, but CVs were increased compared with CTL at DIs of  $<150$  ms, highlighting the biphasic effect of RMPs on the CV and the prolongation of the  $Na^+$  channel recovery time constant at more positive RMPs (27) (e.g., at DI  $\approx 62$  ms, CVs for  $f_{Kir,\text{fb}} = 1.0, 2.5, 5.0,$  and  $10$  were 72.2 cm/s, 78.4 cm/s, 85.4 cm/s, and 89.5 cm/s, respectively). A 1:1 conduction

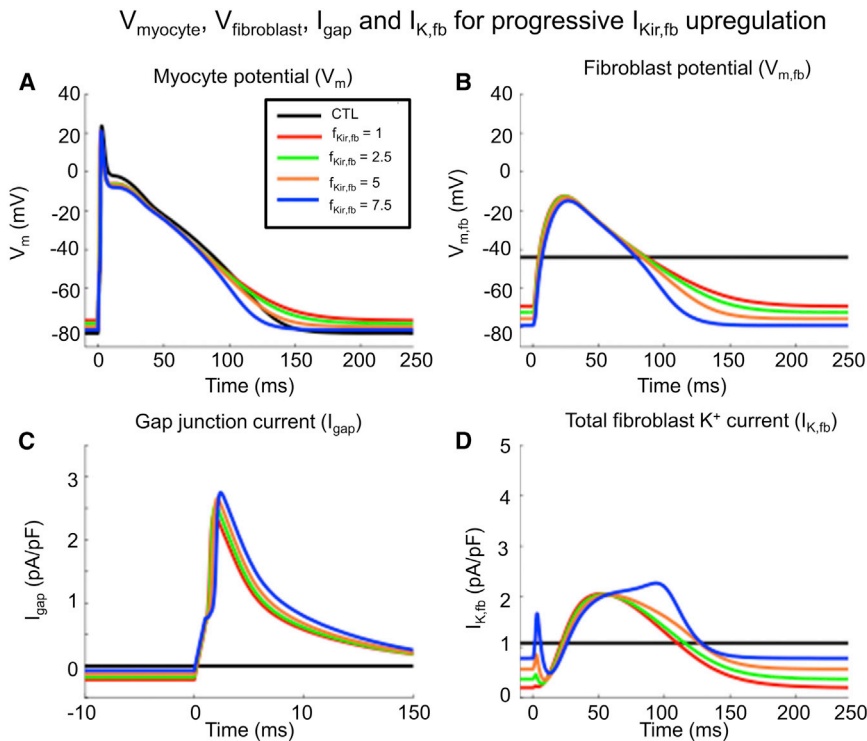

FIGURE 5 (A–D) Effect of fibroblast  $I_{K_{\text{ir,fb}}}$  upregulation on the (A) cardiomyocyte transmembrane potential ( $V_m$ ), (B) fibroblast transmembrane potential ( $V_{m,\text{fb}}$ ), (C) gap-junction current ( $I_{\text{gap}}$ ), and (D) total fibroblast  $K^+$  current ( $I_{K_{\text{ir,fb}}}$ ).  $I_{K_{\text{ir,fb}}}$  upregulation increases fibroblast repolarizing  $K^+$  current density, making the fibroblast behave as a current sink during phases 2 and 3 of the myocyte AP, leading to APD shortening. The cardiomyocyte was hyperpolarized by  $I_{K_{\text{ir,fb}}}$  upregulation, preserving  $\text{Na}^+$  channel availability. Results were obtained with two fibroblasts connected to a cardiomyocyte paced at 4 Hz with a  $G_{\text{gap}}$  of 3 nS. CTL = single-cardiomyocyte action potential in the absence of fibroblast coupling. To see this figure in color, go online.

was sustained at progressively shorter DIs with increasing  $f_{K_{\text{ir,fb}}}$  (Fig. S2 B).

### Effect of fibroblast electrical remodeling on 2D spiral-wave dynamics

Fig. 6 shows the  $\text{APD}_{90}$  distribution over a 2D sheet of atrial cardiomyocytes with moderate fibrosis density and two fibroblasts per cardiomyocyte, with a  $G_{\text{gap}}$  of 3 nS, for progressive  $I_{K_{\text{ir,fb}}}$  upregulation (Fig. 6, top row) and  $I_{K_{\text{v,fb}}}$  downregulation (Fig. 6, bottom row). In accordance with the single-cell and cable analyses, mean  $\text{APD}_{90}$  was progressively shortened by  $I_{K_{\text{ir,fb}}}$  upregulation (mean  $\text{APD}_{90}$  values for  $f_{K_{\text{ir,fb}}} = 1.0, 2.5, 5.0,$  and  $10$  were 121 ms, 116 ms, 107 ms, and 81 ms, respectively; Fig. 6, A–D). The  $\text{APD}_{90}$  dispersion, as quantified by the  $\text{APD}_{90}$  coefficient of variation, increased with  $I_{K_{\text{ir,fb}}}$  upregulation (e.g., the coefficients of variation for CTL and  $f_{K_{\text{ir,fb}}} = 10$  were 0.8% and 6.2%, respectively).  $I_{K_{\text{v,fb}}}$  downregulation (Fig. 6, E–H) prolonged the mean  $\text{APD}_{90}$  (mean  $\text{APD}_{90}$  values for  $f_{K_{\text{v,fb}}} = 1.0, 0.75, 0.5,$  and  $0.25$  were 121 ms, 134 ms, 154 ms, and 159 ms, respectively) and increased the coefficient of variation to an extent similar to that observed for  $I_{K_{\text{ir,fb}}}$  upregulation (coefficients of variation for CTL and  $f_{K_{\text{v,fb}}} = 0.25$  were 0.8% and 6.2%, respectively). Fig. S3 illustrates the increasing spatial variability of APD due to heterogeneous distribution of fibroblasts as a function of ion-current remodeling, by showing results as a heatmap of APD deviations around the mean under each condition.

Fig. 7 A shows snapshots of the cardiomyocyte transmembrane potential as a function of time over a 2D sheet

of cardiomyocytes for progressive  $I_{K_{\text{ir,fb}}}$  upregulation with  $I_{K_{\text{v,fb}}}$  at its CTL value. For the nonremodeled condition ( $f_{K_{\text{ir,fb}}} = 1, f_{K_{\text{v,fb}}} = 1$ , first column), the wavefront quickly drifted out of the substrate and became extinguished on the right boundary after completing a single revolution. For intermediate  $I_{K_{\text{ir,fb}}}$  upregulation ( $f_{K_{\text{ir,fb}}} = 2.5$ , second column), the wavefront completed about three revolutions before terminating. At higher levels of  $I_{K_{\text{ir,fb}}}$  upregulation ( $f_{K_{\text{ir,fb}}} = 5$  and  $10$ ), the wavefront was successfully contained within the substrate boundaries, leading to sustained reentry. Fig. 7 B shows the rotor trajectories of the 2D substrate for the corresponding simulations: as  $f_{K_{\text{ir,fb}}}$  was increased, the rotor stabilized into a more compact, quasi-periodic, rosette-like meandering pattern. Fig. S4 shows the power spectra analysis for  $I_{K_{\text{ir,fb}}}$  upregulation: the dominant frequencies of rotors progressively increased with increasing  $f_{K_{\text{ir,fb}}}$ , passing from 5.7 to 6.1 and then 6.7 Hz. The nonremodeled condition ( $f_{K_{\text{ir,fb}}} = 1, f_{K_{\text{v,fb}}} = 1$ ) terminated after completing a single revolution, precluding a formal calculation of the spiral wave's dominant frequency (it was estimated to be 4.6 Hz).

Fig. S5 A follows the same format as Fig. 7, but for  $I_{K_{\text{v,fb}}}$  downregulation while keeping  $I_{K_{\text{ir,fb}}}$  at the CTL value. As described above, for the CTL condition ( $f_{K_{\text{ir,fb}}} = 1, f_{K_{\text{v,fb}}} = 1$ , leftmost column), the wavefront rapidly became extinguished on a substrate boundary. Similar dynamics are observed with  $f_{K_{\text{v,fb}}} = 0.75$  ( $f_{K_{\text{ir,fb}}} = 1, f_{K_{\text{v,fb}}} = 0.75$ , second column). With 2- and 4-fold  $I_{K_{\text{v,fb}}}$  downregulation, the wavefront failed to depolarize neighboring cardiomyocytes, also leading to propagation failure and reentry termination

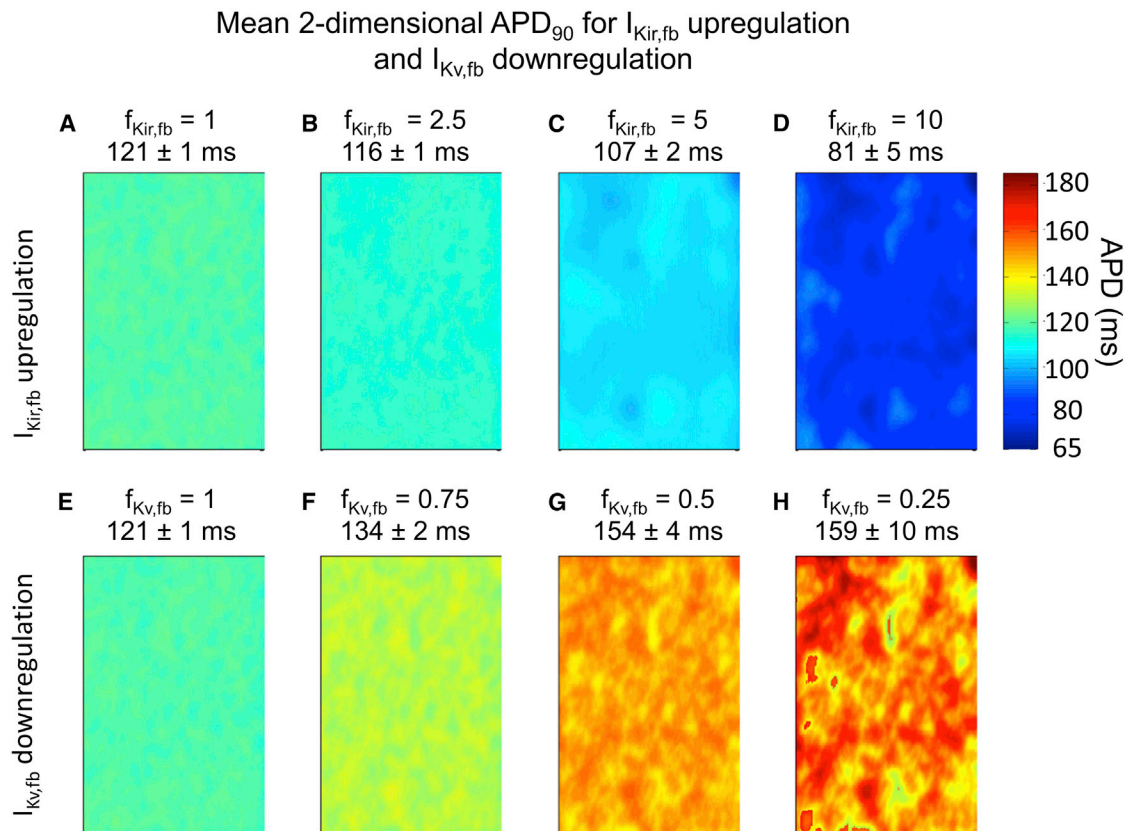

FIGURE 6 (A–H) APD<sub>90</sub> distribution over a 2D sheet of cardiomyocytes with patchy fibrosis (two fibroblasts with a  $G_{\text{gap}}$  of 3 nS per cardiomyocyte) in the 2D model for I<sub>Kir,fb</sub> upregulation (top row, A–D) and I<sub>Kv,fb</sub> downregulation (bottom row, E–H). APD<sub>90</sub> was reduced by I<sub>Kir,fb</sub> upregulation and increased by I<sub>Kv,fb</sub> downregulation. Values above each panel are mean ± SD APD<sub>90</sub> across the substrate. To see this figure in color, go online.

with qualitatively similar dynamics (f<sub>Kir,fb</sub> = 1, f<sub>Kv,fb</sub> = 0.5 and 0.25, third and fourth columns). Fig. S5B shows the rotor trajectories for the corresponding simulations; all three trajectories had the same morphology. Hence, I<sub>Kv,fb</sub> downregulation did not facilitate reentry, and reentry was not sustained long enough to allow for determination of the dominant frequency.

We then investigated the effect of combined I<sub>Kir,fb</sub> upregulation and I<sub>Kv,fb</sub> downregulation on reentry dynamics. Fig. 8, A and B, show representative examples of the dynamics observed under CTL conditions (f<sub>Kir,fb</sub> = 1, f<sub>Kv,fb</sub> = 1), with I<sub>Kv,fb</sub> downregulation (f<sub>Kir,fb</sub> = 1, f<sub>Kv,fb</sub> = 0.25), I<sub>Kir,fb</sub> upregulation (f<sub>Kir,fb</sub> = 5, f<sub>Kv,fb</sub> = 1), and I<sub>Kir,fb</sub> upregulation with the addition of I<sub>Kv,fb</sub> suppression (f<sub>Kir,fb</sub> = 5, f<sub>Kv,fb</sub> = 0), along with corresponding rotor trajectories. I<sub>Kir,fb</sub> upregulation stabilized the primary rotor, leading to sustained reentry (Fig. 8 A, third column versus first column). Keeping I<sub>Kir,fb</sub> at proarrhythmic conditions but simulating the addition of an I<sub>Kv,fb</sub> blocker by I<sub>Kv,fb</sub> downregulation (Fig. 8 A, fourth column) successfully terminated reentry, and the rotor dynamics (Fig. 8 B) became qualitatively similar to the CTL condition. In summary, the arrhythmogenic effect of fibroblast remodeling is strongly dependent on the relative degree of I<sub>Kv,fb</sub> downregulation

and I<sub>Kir,fb</sub> upregulation, and I<sub>Kv,fb</sub> suppression is able to terminate AF under proarrhythmic conditions.

Fig. S6 shows the model-predicted effects of the average experimentally observed change in I<sub>Kir,fb</sub> and I<sub>Kv,fb</sub> remodeling on AF vulnerability. With two fibroblasts per cardiomyocyte, the spiral-wave dynamics were similar to those in the nonremodeled condition, with reentry terminating shortly after initiation. However, with four fibroblasts per cardiomyocyte, the HF-induced fibroblast ionic remodeling effect was greater, leading to more complex reentry dynamics and greater spiral-wave persistence compared with CTL. HF also increased fibroblast capacitance (C<sub>m,fb</sub>), at least in part by increasing fibroblast size (Fig. S7). This increase would be expected to enhance the electrotonic influence of fibroblasts on coupled cardiomyocytes. The result of reproducing experimental HF-induced C<sub>m,fb</sub> increases is also shown in Fig. S6. The HF-induced C<sub>m,fb</sub> remodeling prolonged the time to termination and qualitatively increased the rotor trajectory complexity for two fibroblasts per cardiomyocyte, whereas it had the opposite effect with four fibroblasts per cardiomyocyte. These discrepant changes result from the fact that C<sub>m,fb</sub> increases enhance the effects of both profibrillatory I<sub>Kir,fb</sub> increases and antifibrillatory I<sub>Kv,fb</sub> decreases,

Spiral wave dynamics with progressive  $I_{K_{ir,fb}}$  upregulation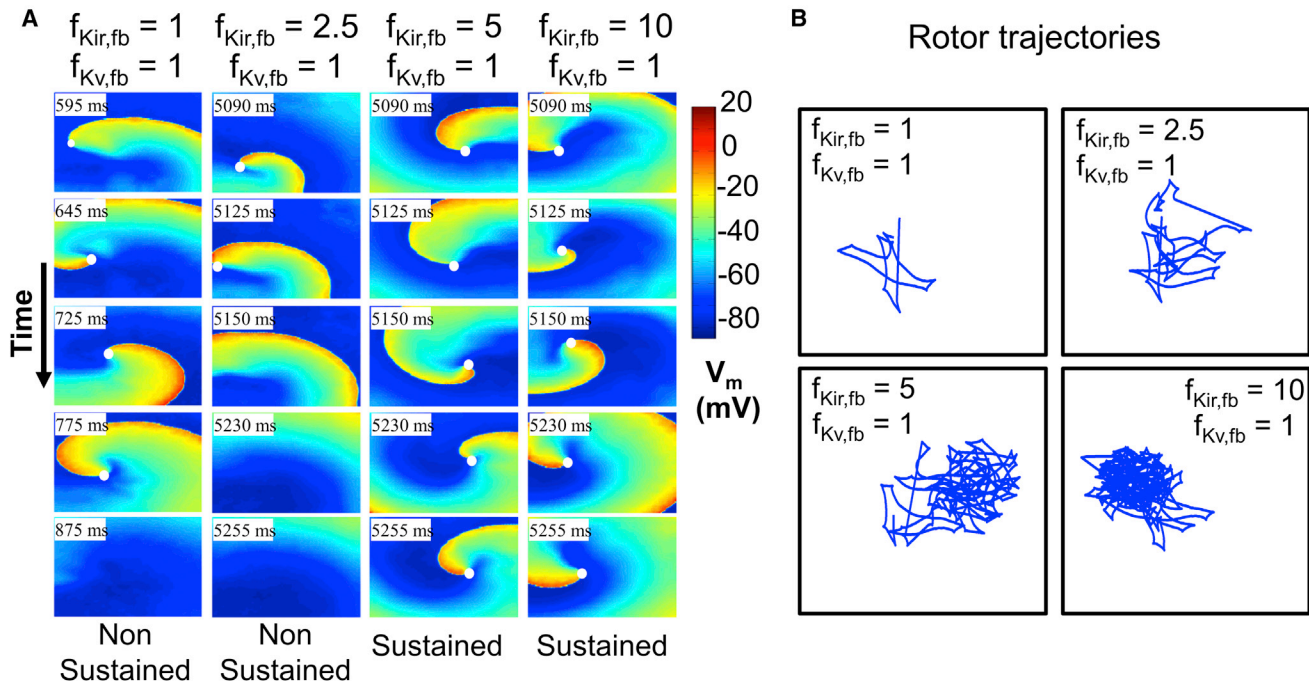

FIGURE 7 (A) Spiral-wave dynamics over time for progressive  $I_{K_{ir,fb}}$  upregulation and fixed  $I_{K_{v,fb}}$ . White dots identify the rotor-tip phase singularities. In the CTL condition ( $f_{K_{ir,fb}} = f_{K_{v,fb}} = 1$ ), the phase singularity drifts rapidly and is extinguished on a boundary. With  $f_{K_{ir,fb}} = 2.5$ , the spiral wave completes one complete revolution before it is extinguished. With  $f_{K_{ir,fb}} = 5$  and 10, reentry is sustained. (B) Rotor trajectory for the corresponding simulations in A. To see this figure in color, go online.

with the net change determined by the balance between the two.

## DISCUSSION

The main findings from this study are that 1), HF induces fibroblast ion-current remodeling by downregulating  $I_{K_{v,fb}}$  and upregulating  $I_{K_{ir,fb}}$ ; 2), in the presence of appreciable cardiomyocyte-fibroblast electrical coupling, fibroblast ionic remodeling affects the electrophysiology of coupled cardiomyocytes; and 3), atrial arrhythmogenesis is altered by fibroblast ion-current remodeling, with  $I_{K_{v,fb}}$  downregulation having an antifibrillatory effect and  $I_{K_{ir,fb}}$  upregulation having a profibrillatory effect. To our knowledge, this is the first report to describe fibroblast ionic current remodeling in the setting of HF and investigate the potential effects of this remodeling on atrial arrhythmogenesis.

### Relation to previous studies of fibroblast ion currents

The properties of  $I_{K_{ir,fb}}$  and  $I_{K_{v,fb}}$  described in this work are grossly similar to those reported in prior studies of rat (29), canine (22,24), and human (30) fibroblasts. The downregulation of  $I_{K_{v,fb}}$  reported here is similar to our observations in previous work, both in fibroblasts from HF animals and

occurring spontaneously under cell-culture conditions (22,24). We are not aware of any previous reports of  $I_{K_{ir,fb}}$  remodeling in HF. The fibroblast RMP was hyperpolarized in HF compared with CTL ( $-53 \pm 2.1$  vs.  $-42 \pm 1.9$  mV) because of upregulation of  $I_{K_{ir,fb}}$ , as the inward-rectifier current is the primary determinant of the fibroblast RMP (31). Our simulated nonremodeled fibroblast RMP closely matched the experimental measurements (experimental and simulated RMPs were  $-42 \pm 1.9$  vs.  $-43.2$  mV, respectively). In our experiments, the baseline  $C_{m,fb}$  was somewhat larger than that previously reported for rat ventricular fibroblasts ( $17.8 \pm 1.4$  vs.  $6.3$  pF) (29) and greatly increased in HF animals ( $29.7 \pm 2.2$  pF), closer to the value of  $53$  pF reported for rat ventricular myofibroblasts (29) and passages 2–6 human fibroblasts (30). The differences among these studies may be due to the species, tissues, and study conditions used.

### Potential role of fibroblast electrical remodeling in atrial arrhythmogenesis

There is extensive evidence from in vitro and simulation models that fibroblast coupling to cardiomyocytes can alter cardiac electrical activity and promote arrhythmogenesis (12), although clear in vivo evidence is lacking. Fibroblasts can couple cardiomyocytes over extended distances,



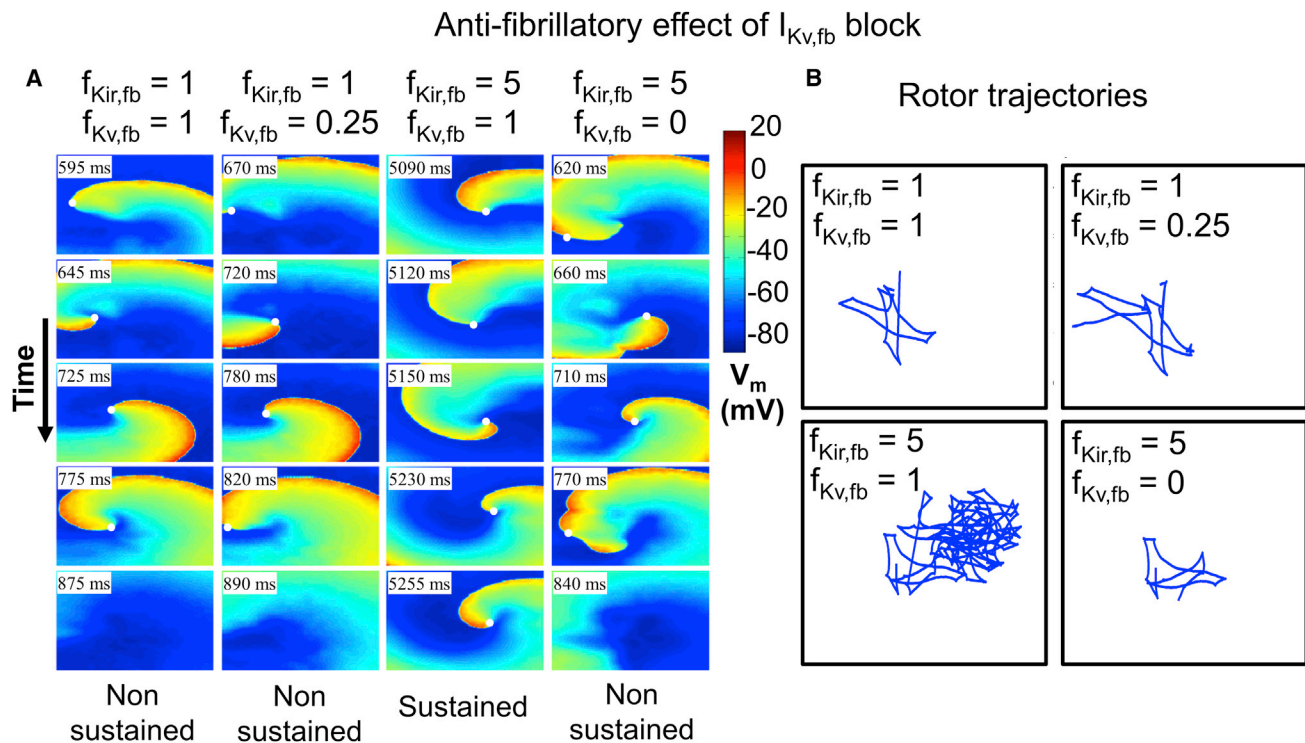

FIGURE 8 (A) Spiral-wave dynamics for representative cases of mixed  $I_{K_{ir,fb}}$  upregulation and  $I_{K_{v,fb}}$  downregulation. Downregulation of  $I_{K_{v,fb}}$  terminates reentry after fewer revolutions under CTL conditions. Conversely,  $I_{K_{ir,fb}}$  upregulation leads to sustained reentry. Simulating the addition of an  $I_{K_{v,fb}}$  blocker under proarrhythmic conditions (*last column*) demonstrates the potential antiarrhythmic effect of  $I_{K_{v,fb}}$  blockade, with reentry termination occurring promptly where reentry had previously been sustained. (B) Trajectories of spiral-wave rotor-core tip corresponding to cases in A. To see this figure in color, go online.

producing arrhythmogenic coupling delays (15). Cardiac injury promotes fibroblast-cardiomyocyte interactions, enhancing their ability to contribute to arrhythmia formation (32). Coculture of myofibroblasts with cardiomyocytes is associated with electrotonic coupling that is highly arrhythmogenic (18). Mathematical modeling work suggests that cardiomyocyte-fibroblast interactions contribute to conduction abnormalities in arrhythmogenic LA posterior walls from HF animals (11) and to complex fractionated electrogram patterns in patients (23).

Mathematical modeling has been applied extensively to assess the potential electrophysiological consequences of fibroblast-cardiomyocyte coupling. Key determinants include the size of individual fibroblasts relative to cardiomyocytes, the number of fibroblasts coupled to cardiomyocytes, and fibroblast density (18–20,34–36). Here, we introduced a determinant that to our knowledge has not been examined before: changes in fibroblast  $K^+$ -channel properties resulting from phenotypic alterations induced by cardiac pathology. We investigated the functional effect of fibroblast electrical remodeling on atrial arrhythmogenesis by independently upregulating  $I_{K_{ir,fb}}$  and downregulating  $I_{K_{v,fb}}$ .  $I_{K_{ir,fb}}$  upregulation proved to be profibrillatory, whereas  $I_{K_{v,fb}}$  downregulation was antifibrillatory. As summarized in Fig. S8, the profibrillatory effect of fibroblast  $I_{K_{ir,fb}}$  upregulation was mediated through an

increased fibroblast repolarizing current. This made the fibroblast act as a current sink for the cardiomyocyte, leading to 1), hyperpolarization of the atrial cardiomyocyte RMP and increased cardiomyocyte  $I_{Na}$  availability; and 2), shortening of the atrial cardiomyocyte APD, thereby preserving cardiomyocyte excitability and facilitating conduction and reentry at higher frequencies (such as those of AF). In contrast, the antifibrillatory effect of  $I_{K_{v,fb}}$  downregulation was mediated through a decrease in fibroblast repolarizing current. This made the fibroblast act as a current source for the cardiomyocyte, leading to 1), depolarization of the atrial cardiomyocyte RMP and decreased  $I_{Na}$  availability; and 2), prolongation of the APD, thereby decreasing cardiomyocyte excitability and impeding reentry.

Our findings are conceptually consistent with previous work on AF-induced cardiomyocyte remodeling by Pandit et al. (37), in which they described the rotor-stabilizing effects of atrial cardiomyocyte  $I_{K_{ir,fb}}$ -equivalent ( $I_{K1}$ ) upregulation. They found that cardiomyocyte  $I_{K1}$  upregulation hyperpolarized the RMP, thereby increasing  $I_{Na}$  availability and shortening the APD. This is similar to what we observed with  $I_{K_{ir,fb}}$  upregulation facilitating reentry and maintenance of the rotor underlying AF. In our study, the cardiomyocyte was hyperpolarized through a novel (to our knowledge) indirect mechanism (i.e., fibroblast electrical remodeling and

cardiomyocyte-fibroblast electrical interaction) in the absence of intrinsic cardiomyocyte  $I_{K1}$  upregulation.

To clarify their individual effects, we performed most of our analyses of  $I_{Kir,fb}$  and  $I_{Kv,fb}$  remodeling by independently up- or downscaling individual current conductances. However, the experimental data show that  $I_{Kv,fb}$  and  $I_{Kir,fb}$  remodeling occurred simultaneously. Therefore, we investigated the effect of simultaneous  $I_{Kv,fb}$  downregulation and  $I_{Kir,fb}$  upregulation (Fig. S6), and found that the balance between these opposing effects determines the consequences of fibroblast ion-current remodeling on AF properties. Using experimentally obtained values for  $I_{Kir,fb}$  upregulation and  $I_{Kv,fb}$  downregulation, we found that HF-induced fibroblast ionic remodeling has the capacity to promote AF (Fig. S6) while prolonging the effective refractory period, as observed experimentally (Tables S1 and S2). However, for a given upregulated  $f_{Kir,fb}$ , one could observe sustained reentry, nonsustained reentry, or no reentry at all depending on the degree of  $I_{Kv,fb}$  downregulation. With our first-order model, it is difficult to directly correlate the magnitude of the experimentally observed remodeling with mathematical-model predictions regarding atrial arrhythmogenesis. Nevertheless,  $I_{Kv,fb}$  had to be downregulated to extreme values before it could counterbalance modest  $I_{Kir,fb}$  upregulation. Atrial cardiomyocyte ionic-current remodeling also occurs in HF (38). Implementing both cardiomyocyte and fibroblast ionic modeling (Tables S1 and S2), we found that the cardiomyocyte ionic remodeling previously reported to prolong the APD and ERP (38) makes reentry maintenance more difficult, but does not otherwise alter the qualitative properties of AF associated with fibroblast ionic remodeling as described here (Fig. S9).

### Novelty and potential importance

The notion that atrial ion-current remodeling plays an important role in AF promotion has been established for almost 20 years (39). Atrial ion-current remodeling has always been associated with cardiomyocyte ion currents, but here we show for the first time (to our knowledge) that the fibroblast ion-current remodeling occurring with AF-promoting pathologies might affect AF susceptibility. The remodeling of ion currents in fibroblasts coupled to cardiomyocytes was able to contribute to the AF-maintaining substrate via electrotonic interactions that modified cardiomyocyte electrical function in profibrillatory ways. We also found that reducing  $I_{Kv,fb}$  could counter the profibrillatory effect of  $I_{Kir,fb}$  upregulation and lead to reentry termination (Fig. 8), providing a proof-of-principle for the plausibility of targeting the ion currents of cardiomyocyte-coupled fibroblasts for antiarrhythmic purposes. Conversely, one could target  $I_{Kir,fb}$ , as upregulation of this current was clearly found to facilitate reentry. Traditional cardiomyocyte  $K^+$ -channel blockers are moderately effective antiar-

rhythmic agents; however, their use is severely limited by ventricular proarrhythmic risk (e.g., torsade de pointes), resulting from APD and QTc prolongation (40). A selective blocker of fibroblast Kv or Kir current with little action on corresponding cardiomyocyte currents might convey antiarrhythmic activity, with the benefit of interacting with atrial tissue predominantly in areas of fibrosis, thereby theoretically avoiding the risk of  $K^+$  channel blocker-induced ventricular proarrhythmia. If significant atrial fibroblast-cardiomyocyte coupling is confirmed in vivo, it might be of interest to search for molecular and/or functional differences between cardiomyocyte and fibroblast  $K^+$  channels as a basis for developing fibroblast-selective pharmacological agents.

Targeting fibroblast ionic currents for antiarrhythmic drug therapy might have applications beyond rhythm control of AF. Ventricular tachyarrhythmias in patients with ischemic cardiomyopathies are a major source of cardiovascular morbidity and a leading cause of sudden cardiac death (41). These arrhythmias often originate in postinfarction scars with complex networks of viable and hibernating myocardium imbedded within the area of infarction, making such highly proarrhythmic lesions difficult to treat via catheter ablation (42). Targeting ventricular fibroblast ion currents to produce antiarrhythmic electrophysiological changes in and around the infarct site may provide a new paradigm for the management of complex ventricular arrhythmias (43). Evidence suggests that modulating the fibroblast ATP-regulated  $K^+$  current may be exploited to alter border-zone electrophysiology in infarcted hearts (44).

### Potential limitations

A significant limitation of this work is the lack of in vivo evidence of cardiomyocyte-fibroblast electrical coupling. Several studies have demonstrated the existence of cardiomyocyte-fibroblast electrical coupling in experimental co-cultured media. Nevertheless, with the exception of work on the sinoatrial node (16), up to now, it has not been technically possible to determine whether such coupling occurs in vivo. Despite extensive experimentation with a variety of in vitro systems, this fundamental question remains to be resolved to establish the in vivo relevance of cardiomyocyte-fibroblast electrical interactions in the heart. Establishing the significance of fibroblast electrical remodeling in the pathogenesis of AF remains critically dependent on experimental validation of electrical coupling between cardiomyocytes and fibroblasts in the atrium in situ.

In this work, we only considered cardiomyocyte-fibroblast coupling (single-sided connections in Kohl and Camelliti's (46) terminology), and did not consider that fibroblasts may couple to more than one cardiomyocyte at a time, creating electrical connections between previously disconnected cardiomyocytes (double-sided connections). We

used a single specific value for  $G_{\text{gap}}$ , knowing that the magnitude of this parameter can have a significant impact on the dynamics of cardiomyocyte-fibroblast coupling (19). We selected a  $G_{\text{gap}}$  that is well within experimentally reported values, which range from 0.31 to 8 nS (13,14). In addition, we examined limited combinations of conditions of fibroblast coupling and numbers of fibroblasts coupled to cardiomyocytes ( $N_{\text{fb}}$ ). Fig. S10 shows a further examination of the parameter space, varying  $N_{\text{fb}}$ ,  $G_{\text{gap}}$ , and  $C_{\text{m,fb}}$ . Some of the parameter manipulations had the expected effects (e.g., decreasing  $N_{\text{fb}}$  or  $C_{\text{m,fb}}$  attenuated the effects of ionic remodeling, reducing  $C_{\text{m,fb}}$ , and reducing  $G_{\text{gap}}$  virtually eliminated the effect of  $I_{\text{Kv,fb}}$  downregulation). Increasing these variables had no clear effect, perhaps because the default values were already sufficiently large that further increases produced little additional change. We also did not include the HF-induced cardiomyocyte ionic and capacitance remodeling. A limited set of simulations with remodeled cardiomyocytes did not qualitatively change the nature of our results (Fig. S9). Furthermore, we used a 2D sheet to study the effect of fibroblast electrical remodeling on reentry dynamics. This choice led to the introduction of geometrical constraints that can potentially bias arrhythmia sustainability in situations of increased meandering, leading to rotor extinction on substrate boundaries, with substrate size being an important determinant of reentry maintenance.

Finally, we used a fibroblast ionic model that was developed based on observations in ventricular fibroblasts (20). Burstein et al. (47) showed that atrial and ventricular fibroblasts behave and proliferate differently. However, they did not identify any ion-channel subunit expression differences by genome-wide analysis, and recent work suggests that atrial and ventricular  $I_{\text{Kv,fb}}$  differ significantly only at physiologically nonrelevant voltages positive to +60 mV (24). In addition, there were no differences in  $I_{\text{Kv,fb}}$  for atrial versus ventricular fibroblasts from HF dogs (24).

## CONCLUSIONS

HF induces fibroblast ion-current remodeling: fibroblast Kv current is downregulated, whereas fibroblast Kir current is upregulated. Mathematical modeling indicates antifibrillatory effects of  $I_{\text{Kv,fb}}$  downregulation and profibrillatory effects of  $I_{\text{Kir,fb}}$  upregulation, and reveals the underlying electrophysiological mechanisms. Therefore, the outcome of fibroblast electrical remodeling in atria with a disease-induced AF substrate will critically depend on the balance between pro- and antifibrillatory changes. If efficient electrical coupling between atrial fibroblasts and cardiomyocytes can be confirmed in vivo, pharmacological modulation of fibroblast  $K^+$  currents might be useful as a potential AF-selective target for antiarrhythmic drug therapy. These findings provide new insights (to our knowledge) into the

potential role of fibroblasts in the pathogenesis and treatment of AF.

## SUPPORTING MATERIAL

Ten figures and two tables are available at [http://www.biophysj.org/biophysj/supplemental/S0006-3495\(14\)01065-0](http://www.biophysj.org/biophysj/supplemental/S0006-3495(14)01065-0).

The authors thank Nathalie L'Heureux and Chantal St-Cyr for technical help, and France Thériault for secretarial assistance with the manuscript.

This work was supported by the Canadian Institutes of Health Research (grant 43565) and the Heart and Stroke Foundation of Canada.

## REFERENCES

- Nattel, S. 2002. New ideas about atrial fibrillation 50 years on. *Nature*. 415:219–226.
- Ehrlich, J. R., and S. Nattel. 2009. Novel approaches for pharmacological management of atrial fibrillation. *Drugs*. 69:757–774.
- Roy, D., M. Talajic, ..., A. L. Waldo; Atrial Fibrillation and Congestive Heart Failure Investigators 2008. Rhythm control versus rate control for atrial fibrillation and heart failure. *N. Engl. J. Med.* 358:2667–2677.
- Wijffels, M. C., C. J. Kirchhof, ..., M. A. Allessie. 1995. Atrial fibrillation begets atrial fibrillation. A study in awake chronically instrumented goats. *Circulation*. 92:1954–1968.
- Wijffels, M. C., C. J. Kirchhof, ..., M. A. Allessie. 1997. Electrical remodeling due to atrial fibrillation in chronically instrumented conscious goats: roles of neurohumoral changes, ischemia, atrial stretch, and high rate of electrical activation. *Circulation*. 96:3710–3720.
- Li, D., S. Fareh, ..., S. Nattel. 1999. Promotion of atrial fibrillation by heart failure in dogs: atrial remodeling of a different sort. *Circulation*. 100:87–95.
- Sun, H., D. Chartier, ..., S. Nattel. 2001. Intracellular calcium changes and tachycardia-induced contractile dysfunction in canine atrial myocytes. *Cardiovasc. Res.* 49:751–761.
- Carver, W., M. L. Nagpal, ..., L. Terracio. 1991. Collagen expression in mechanically stimulated cardiac fibroblasts. *Circ. Res.* 69:116–122.
- Kawara, T., R. Derksen, ..., J. M. de Bakker. 2001. Activation delay after premature stimulation in chronically diseased human myocardium relates to the architecture of interstitial fibrosis. *Circulation*. 104:3069–3075.
- Spach, M. S., J. F. Heidlage, ..., R. C. Barr. 2007. Mechanism of origin of conduction disturbances in aging human atrial bundles: experimental and model study. *Heart Rhythm*. 4:175–185.
- Tanaka, K., S. Zlochiver, ..., J. Kalifa. 2007. Spatial distribution of fibrosis governs fibrillation wave dynamics in the posterior left atrium during heart failure. *Circ. Res.* 101:839–847.
- Yue, L., J. Xie, and S. Nattel. 2011. Molecular determinants of cardiac fibroblast electrical function and therapeutic implications for atrial fibrillation. *Cardiovasc. Res.* 89:744–753.
- Rook, M. B., H. J. Jongsma, and B. de Jonge. 1989. Single channel currents of homo- and heterologous gap junctions between cardiac fibroblasts and myocytes. *Pflugers Arch.* 414:95–98.
- Rook, M. B., A. C. van Ginneken, ..., H. J. Jongsma. 1992. Differences in gap junction channels between cardiac myocytes, fibroblasts, and heterologous pairs. *Am. J. Physiol.* 263:C959–C977.
- Gaudesius, G., M. Miragoli, ..., S. Rohr. 2003. Coupling of cardiac electrical activity over extended distances by fibroblasts of cardiac origin. *Circ. Res.* 93:421–428.
- Camelliti, P., C. R. Green, ..., P. Kohl. 2004. Fibroblast network in rabbit sinoatrial node: structural and functional identification of homogeneous and heterogeneous cell coupling. *Circ. Res.* 94:828–835.

17. Miragoli, M., G. Gaudesius, and S. Rohr. 2006. Electrotonic modulation of cardiac impulse conduction by myofibroblasts. *Circ. Res.* 98:801–810.
18. Zlochiver, S., V. Muñoz, ..., J. Jalife. 2008. Electrotonic myofibroblast-to-myocyte coupling increases propensity to reentrant arrhythmias in two-dimensional cardiac monolayers. *Biophys. J.* 95:4469–4480.
19. Jacquemet, V., and C. S. Henriquez. 2008. Loading effect of fibroblast-myocyte coupling on resting potential, impulse propagation, and repolarization: insights from a microstructure model. *Am. J. Physiol. Heart Circ. Physiol.* 294:H2040–H2052.
20. MacCannell, K. A., H. Bazzazi, ..., W. R. Giles. 2007. A mathematical model of electrotonic interactions between ventricular myocytes and fibroblasts. *Biophys. J.* 92:4121–4132.
21. Wakili, R., N. Voigt, ..., S. Nattel. 2011. Recent advances in the molecular pathophysiology of atrial fibrillation. *J. Clin. Invest.* 121:2955–2968.
22. Dawson, K., C. T. Wu, ..., S. Nattel. 2012. Congestive heart failure effects on atrial fibroblast phenotype: differences between freshly-isolated and cultured cells. *PLoS ONE.* 7:e52032.
23. Ashihara, T., R. Haraguchi, ..., N. A. Trayanova. 2012. The role of fibroblasts in complex fractionated electrograms during persistent/permanent atrial fibrillation: implications for electrogram-based catheter ablation. *Circ. Res.* 110:275–284.
24. Wu, C. T., X. Y. Qi, ..., S. Nattel. 2014. Disease and region-related cardiac fibroblast potassium current variations and potential functional significance. *Cardiovasc. Res.* 102:487–496.
25. Ramirez, R. J., S. Nattel, and M. Courtemanche. 2000. Mathematical analysis of canine atrial action potentials: rate, regional factors, and electrical remodeling. *Am. J. Physiol. Heart Circ. Physiol.* 279:H1767–H1785.
26. Kneller, J., R. Zou, ..., S. Nattel. 2002. Cholinergic atrial fibrillation in a computer model of a two-dimensional sheet of canine atrial cells with realistic ionic properties. *Circ. Res.* 90:E73–E87.
27. Xie, Y., A. Garfinkel, ..., Z. Qu. 2009. Effects of fibroblast-myocyte coupling on cardiac conduction and vulnerability to reentry: a computational study. *Heart Rhythm.* 6:1641–1649.
28. Comtois, P., M. Sakabe, ..., S. Nattel. 2008. Mechanisms of atrial fibrillation termination by rapidly unbinding Na<sup>+</sup> channel blockers: insights from mathematical models and experimental correlates. *Am. J. Physiol. Heart Circ. Physiol.* 295:H1489–H1504.
29. Chilton, L., S. Ohya, ..., W. R. Giles. 2005. K<sup>+</sup> currents regulate the resting membrane potential, proliferation, and contractile responses in ventricular fibroblasts and myofibroblasts. *Am. J. Physiol. Heart Circ. Physiol.* 288:H2931–H2939.
30. Li, G. R., H. Y. Sun, ..., C. P. Lau. 2009. Characterization of multiple ion channels in cultured human cardiac fibroblasts. *PLoS ONE.* 4:e7307.
31. Shibukawa, Y., E. L. Chilton, ..., W. R. Giles. 2005. K<sup>+</sup> currents activated by depolarization in cardiac fibroblasts. *Biophys. J.* 88:3924–3935.
32. Vasquez, C., P. Mohandas, ..., G. E. Morley. 2010. Enhanced fibroblast-myocyte interactions in response to cardiac injury. *Circ. Res.* 107:1011–1020.
33. Reference deleted in proof.
34. Sachse, F. B., A. P. Moreno, ..., J. A. Abildskov. 2009. A model of electrical conduction in cardiac tissue including fibroblasts. *Ann. Biomed. Eng.* 37:874–889.
35. Xie, Y., A. Garfinkel, ..., Z. Qu. 2009. Cardiac alternans induced by fibroblast-myocyte coupling: mechanistic insights from computational models. *Am. J. Physiol. Heart Circ. Physiol.* 297:H775–H784.
36. McDowell, K. S., H. J. Arevalo, ..., N. A. Trayanova. 2011. Susceptibility to arrhythmia in the infarcted heart depends on myofibroblast density. *Biophys. J.* 101:1307–1315.
37. Pandit, S. V., O. Berenfeld, ..., J. Jalife. 2005. Ionic determinants of functional reentry in a 2-D model of human atrial cells during simulated chronic atrial fibrillation. *Biophys. J.* 88:3806–3821.
38. Li, D., P. Melnyk, ..., S. Nattel. 2000. Effects of experimental heart failure on atrial cellular and ionic electrophysiology. *Circulation.* 101:2631–2638.
39. Yue, L., J. Feng, ..., S. Nattel. 1997. Ionic remodeling underlying action potential changes in a canine model of atrial fibrillation. *Circ. Res.* 81:512–525.
40. Tamargo, J., R. Caballero, ..., E. Delpón. 2004. Pharmacology of cardiac potassium channels. *Cardiovasc. Res.* 62:9–33.
41. Zheng, Z. J., J. B. Croft, ..., G. A. Mensah. 2001. Sudden cardiac death in the United States, 1989 to 1998. *Circulation.* 104:2158–2163.
42. Josephson, M. R. 2008. *Clinical Cardiac Electrophysiology: Techniques and Interpretations*, 4th ed. Lippincott Williams & Wilkins, Philadelphia.
43. Feld, Y., M. Melamed-Frank, ..., L. Gepstein. 2002. Electrophysiological modulation of cardiomyocytic tissue by transfected fibroblasts expressing potassium channels: a novel strategy to manipulate excitability. *Circulation.* 105:522–529.
44. Benamer, N., C. Vasquez, ..., G. E. Morley. 2013. Fibroblast KATP currents modulate myocyte electrophysiology in infarcted hearts. *Am. J. Physiol. Heart Circ. Physiol.* 304:H1231–H1239.
45. Reference deleted in proof.
46. Kohl, P., and P. Camelliti. 2007. Cardiac myocyte-nonmyocyte electrotonic coupling: implications for ventricular arrhythmogenesis. *Heart Rhythm.* 4:233–235.
47. Burstein, B., E. Libby, ..., S. Nattel. 2008. Differential behaviors of atrial versus ventricular fibroblasts: a potential role for platelet-derived growth factor in atrial-ventricular remodeling differences. *Circulation.* 117:1630–1641.

# **Fibroblast Electrical Remodeling in Heart Failure and Potential Effects on Atrial Fibrillation**

Martin Aguilar, MD Xiao Yan Qi, PhD Hai Huang, PhD Philippe Comtois, PhD  
Stanley Nattel, MD

## **SUPPLEMENTAL MATERIALS**

**SUPPLEMENTAL FIGURES****Supplemental Figure 1**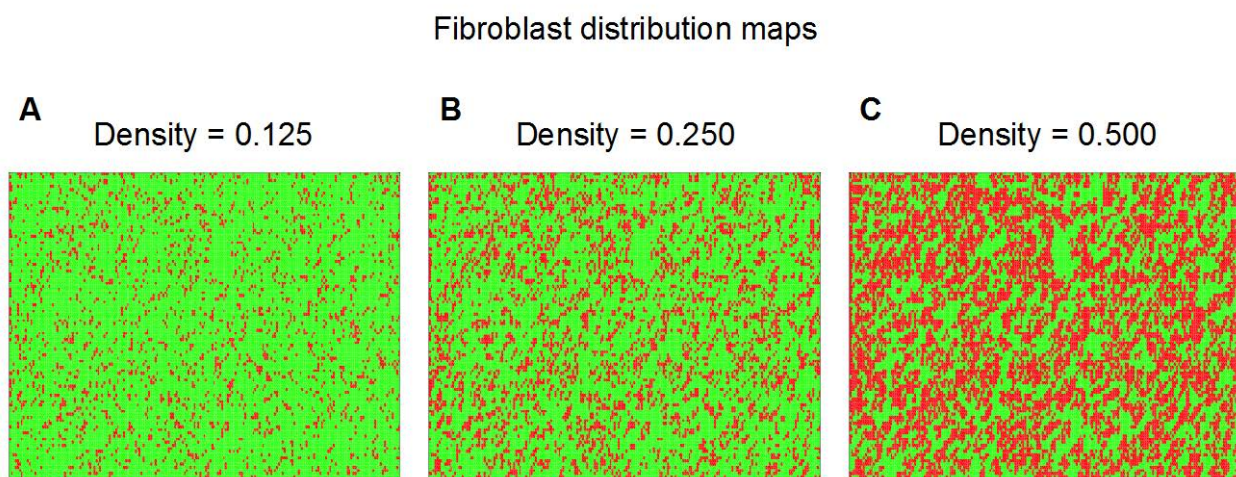

**Supplemental Figure 1.** Fibroblast distribution maps. Three different fibroblast distributions were investigated; low, medium and high densities corresponding to 12.5%, 25% and 50% of cardiomyocytes coupled to 2 fibroblasts. The red patches represent areas of fibrosis.

## Supplemental Figure 2

Cable APD, RMP, V<sub>max</sub> and CV as a function of Diastolic Interval (DI)

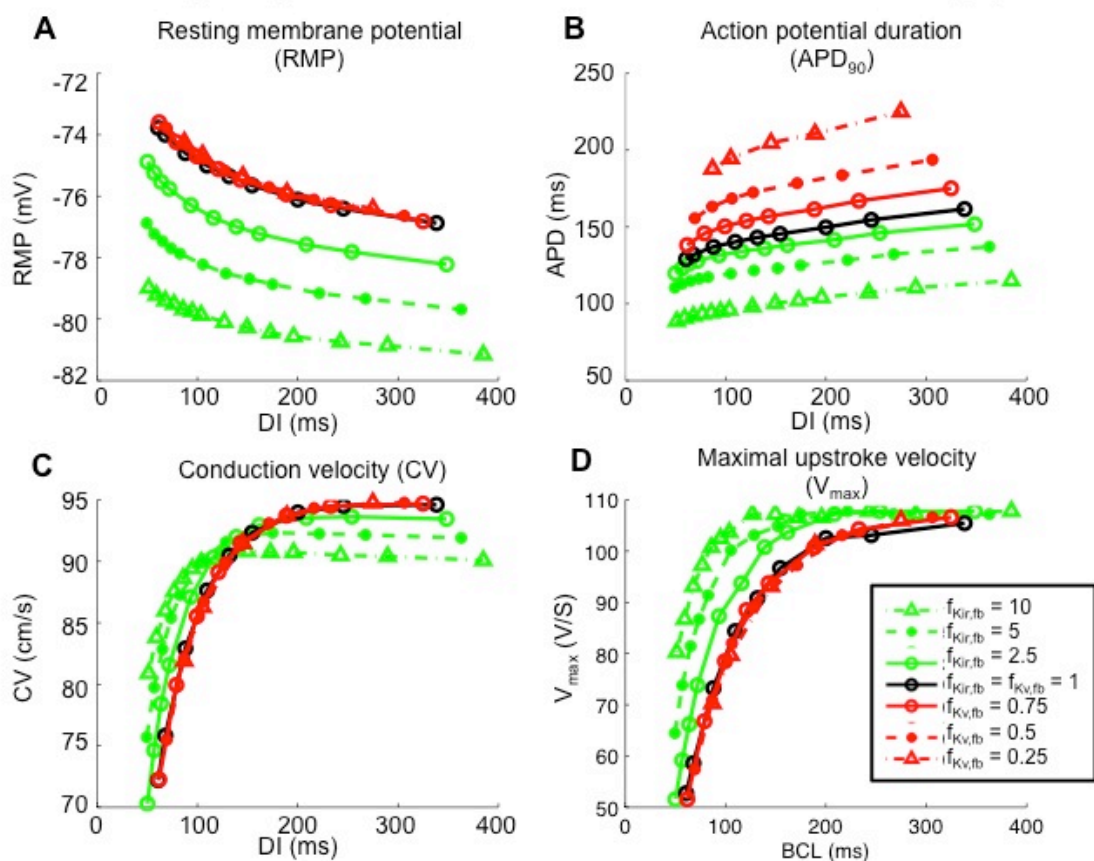

**Supplementary Figure 2.** Effect of progressive  $I_{K_{v,fb}}$  downregulation (red curves) and  $I_{K_{ir,fb}}$  upregulation (green curves) on the cardiomyocyte resting membrane potential (RMP), action potential duration ( $APD_{90}$ ), conduction velocity (CV) and maximal upstroke velocity ( $V_{max}$ ) as a function of the diastolic interval (DI) for a 10-cm cable of cardiomyocytes with 2 fibroblasts per cardiomyocyte with  $G_{gap}$  of 3 nS. The control curve in black is for  $f_{K_{v,fb}} = f_{K_{ir,fb}} = 1$ .  $I_{K_{v,fb}}$  downregulation had a small depolarizing effect on the RMP, prolonged  $APD_{90}$ , with negligible effect on CV.  $I_{K_{ir,fb}}$  upregulations had the opposite effect; it significantly hyperpolarized RMP, shortened  $APD_{90}$  and preserved CV and 1:1 conduction at progressively shorter DIs with increasing  $f_{K_{ir,fb}}$ .

### Supplementary Figure 3

2-dimensional APD<sub>90</sub> variations (deviations from mean)  
for  $I_{K_{ir,fb}}$  upregulation and  $I_{K_{v,fb}}$  downregulation

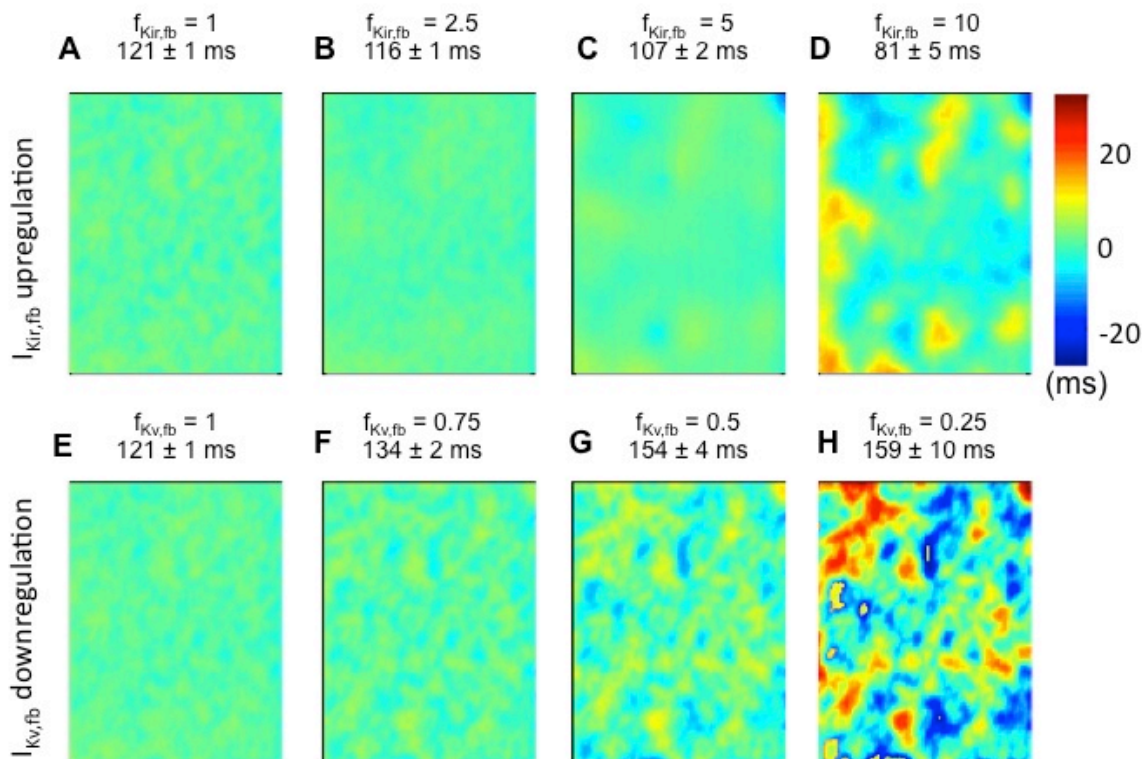

**Supplementary Figure 3.** Distribution of APD<sub>90</sub>-deviations from mean-values over a 2-dimensional sheet of cardiomyocytes with patchy fibrosis (2 fibroblasts per cardiomyocyte with a  $G_{gap}$  of 3 nS) in the 2-dimensional model for progressive  $I_{K_{ir,fb}}$  upregulation (top row, panels A-D) and  $I_{K_{v,fb}}$  downregulation (bottom row, panels E-H). APD<sub>90</sub> dispersion, as indicated by the standard deviation, increases with both  $I_{K_{ir,fb}}$  upregulation and  $I_{K_{v,fb}}$  downregulation from <1% to 6%. Values above each panel are mean±standard deviation APD<sub>90</sub> across the substrate.



## Dominant frequency analysis for $I_{K_{ir,fb}}$ upregulation

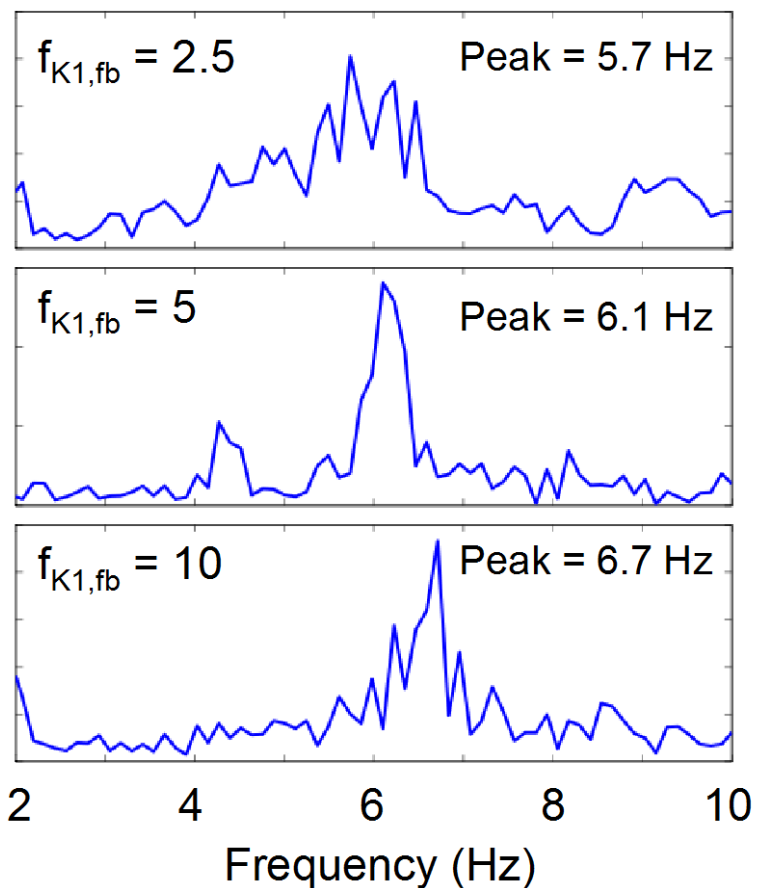

**Supplemental Figure 4.** Power spectrum analysis for  $f_{K_{ir,fb}} = \{2.5, 5, 10\}$ .  $I_{K_{ir,fb}}$  upregulation progressively increased the spiral-wave dominant frequency from 5.7 to 6.7 Hz. For  $f_{K_{ir,fb}} = 1$ , reentry was non-sustained, precluding precise computation of the dominant frequency, but it was estimated at 4.6 Hz.

## Supplemental Figure 5

Spiral wave dynamics with progressive  $I_{Kv,fb}$  downregulation

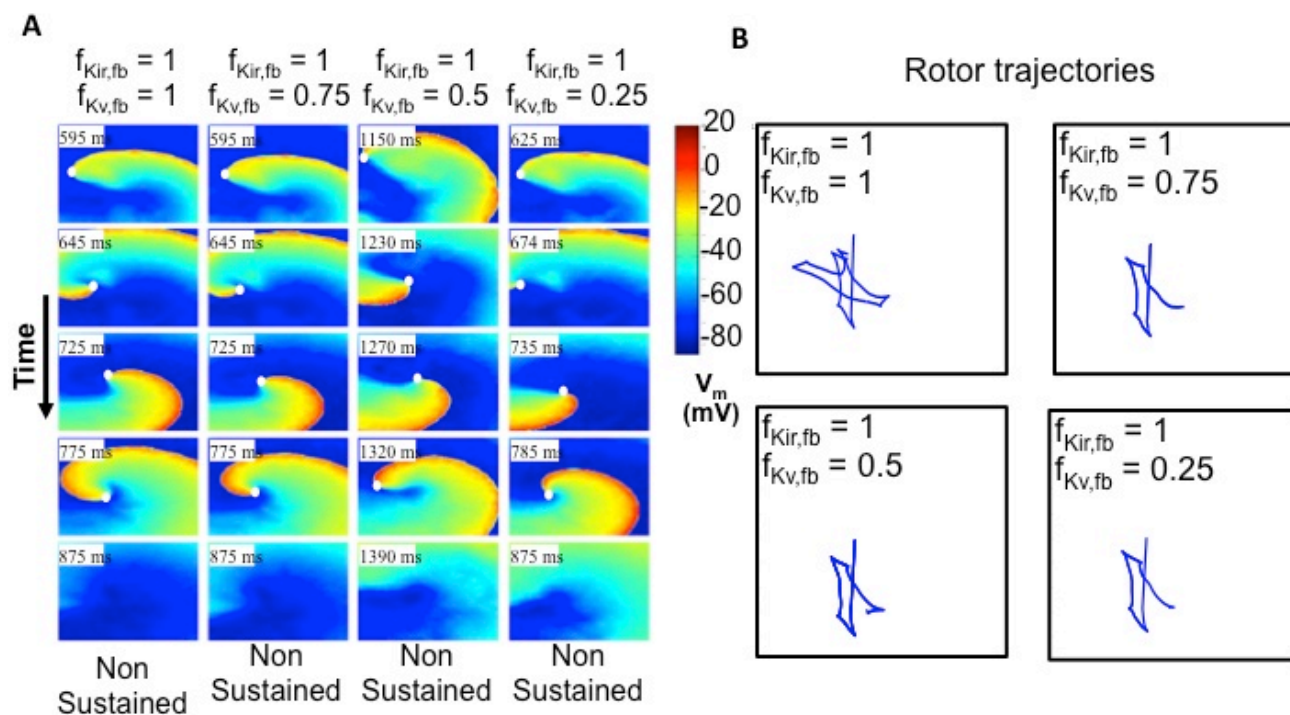

**Supplementary Figure 5.** (A) Spiral-wave dynamics over time for progressive  $I_{Kv,fb}$  downregulation for fixed  $I_{Kir,fb}$ . White dots identify the rotor-tip phase-singularities. In the control condition ( $f_{Kir,fb} = f_{Kv,fb} = 1$ ), the phase-singularity drifts and extinguishes on a boundary. As  $I_{Kv,fb}$  is downregulated ( $f_{Kv,fb} = 0.5$  and  $0.25$ ), the wavefront fails to depolarize surrounding cardiomyocytes, leading to propagation failure and termination. (B) Rotor trajectory for the corresponding simulations in (A). Qualitatively similar trajectories were observed.

### Supplemental Figure 6

Spiral wave dynamics with experimental values of  $f_{Kir,fb}$  and  $f_{Kv,fb}$

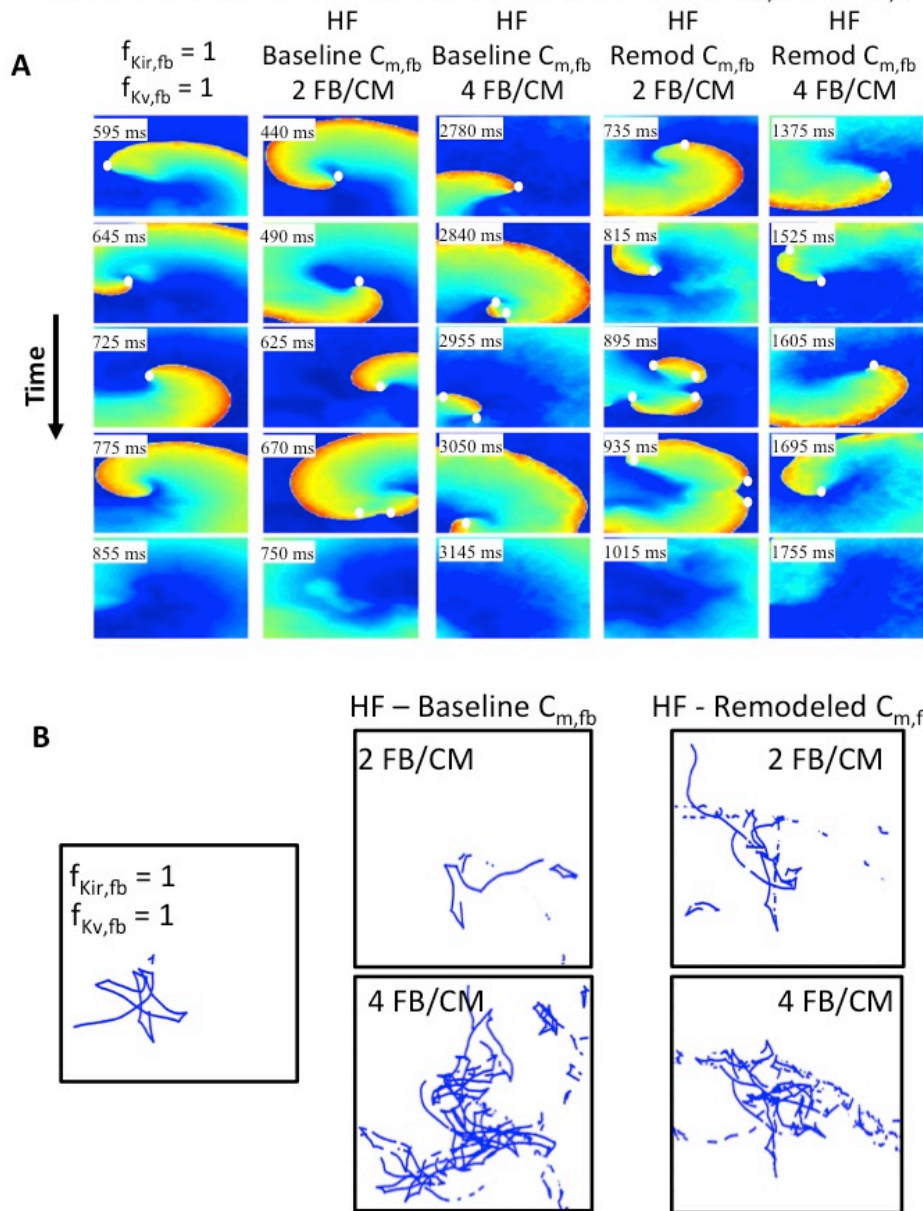

**Supplemental Figure 6.** Spiral-wave dynamics for the control ( $f_{Kir,fb} = f_{Kv,fb} = 1$ ) and HF-induced fibroblast ionic and capacitance remodeling ( $f_{Kir,fb} = 1.79$  and  $f_{Kv,fb} = 0.56$ ;  $C_{m,fb}$  remodeled =  $1.67 \times C_{m,fb}$  baseline) using moderate fibroblast density distribution (0.250) with 2 and 4 fibroblasts/cardiomyocyte. HF with 2 fibroblasts/cardiomyocyte led to non-sustained reentry, similar to the control case; however, rotor trajectory complexity was qualitatively increased with remodeled  $C_{m,fb}$ . Using 4 fibroblasts/cardiomyocyte also led to non-sustained reentry; however, the time to termination was longer compared to control and HF with 2 fibroblasts/cardiomyocyte for both  $C_{m,fb}$  settings. (B) Respective rotor trajectories. All cases were non-sustained, but HF with 4 fibroblasts/cardiomyocyte displayed more complex and longer-lasting dynamics.

**Supplemental Figure 7**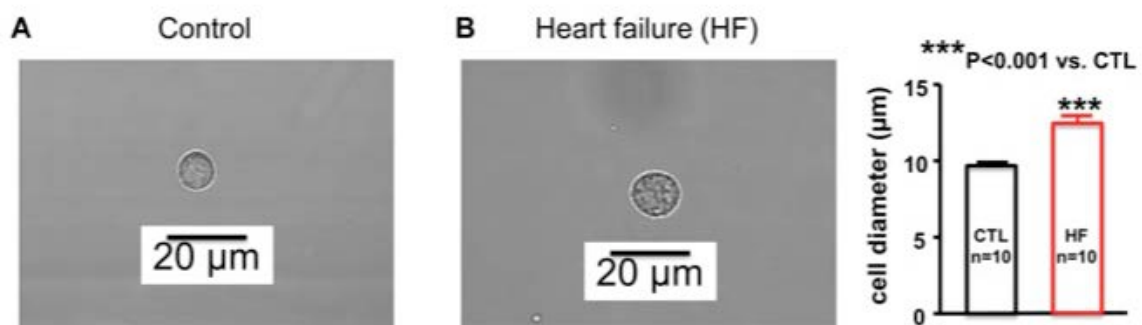

**Supplemental Figure 7.** Size difference between a control (A) and heart failure (B) fibroblast, along with mean cell diameter values for 10 cells of each type. Heart failure increased fibroblast size accounting, at least in part, for the increase in the membrane capacitance in heart failure compared to control.

Supplemental Figure 8

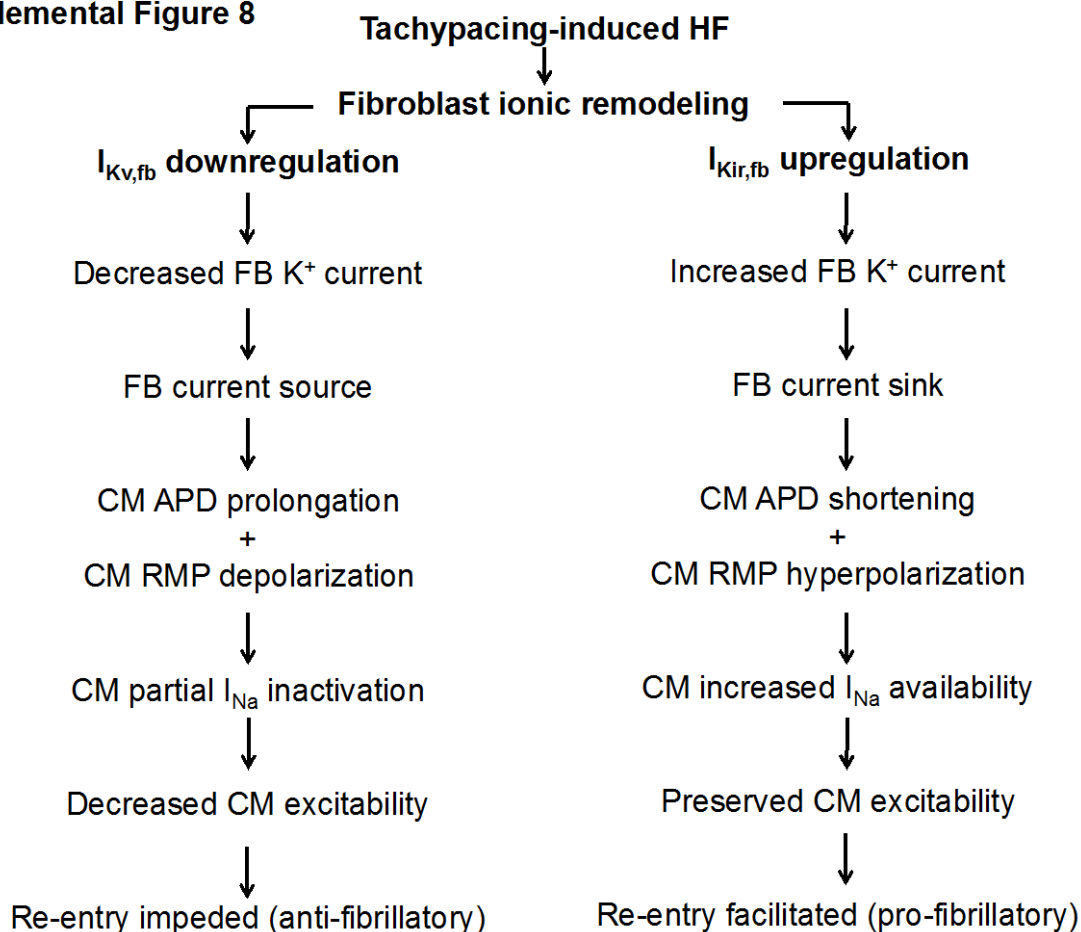

**Supplementary Figure 8.** Summary of electrophysiological effects observed for fibroblast electrical remodeling and consequences for atrial arrhythmogenesis.  $I_{Kv,fb}$  downregulation in tachypacing-induced HF leads to decreased fibroblast (FB) repolarizing current, thus making it a source of depolarizing current for the cardiomyocyte (CM). This effect prolongs cardiomyocyte APD and depolarizes RMP, thus inducing  $I_{Na}$  inactivation, reduced  $V_{max}$ , CV and cardiomyocyte excitability and impeding reentry (anti-fibrillatory effect).  $I_{Kir,fb}$  was upregulated in tachypacing-induced HF, leading to increased fibroblast repolarizing current and making the fibroblast a current sink for the myocyte. This effect shortened cardiomyocyte APD and hyperpolarizing RMP, increasing  $I_{Na}$  availability, maintaining  $V_{max}$ , CV and cardiomyocyte excitability at high activation frequencies, thereby facilitating reentry (pro-fibrillatory effect).

**Supplemental Figure 9** Spiral wave dynamics with and without cardiomyocyte and fibroblast remodeling

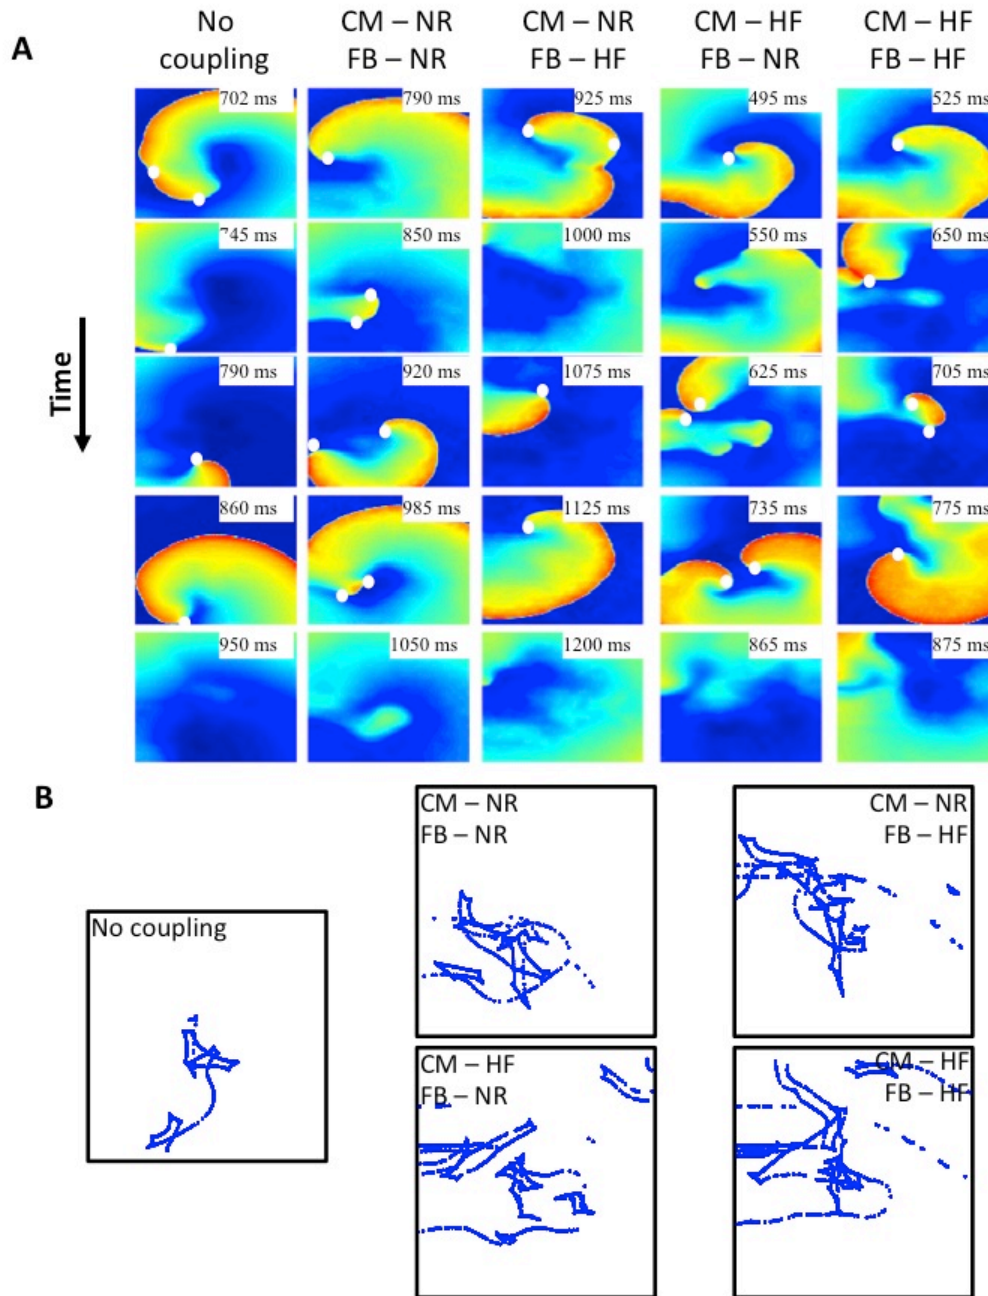

**Supplemental Figure 9** Effect of the experimentally observed cardiomyocyte and fibroblast ionic and capacitance remodeling on reentry dynamics (A) and rotor trajectories (B). Two-dimensional reentry dynamics with and without cardiomyocyte ionic and capacitance remodeling were qualitatively similar, although termination was slightly faster with the remodeled cardiomyocyte. Fibroblast remodeling tended to prolong the duration of reentry but did not have a significant qualitative effect.

## Supplemental Figure 10

2D time to termination for control, proarrhythmic and antiarrhythmic conditions for variable  $N_{fb}$ ,  $G_{gap}$ , and  $C_{m,fb}$

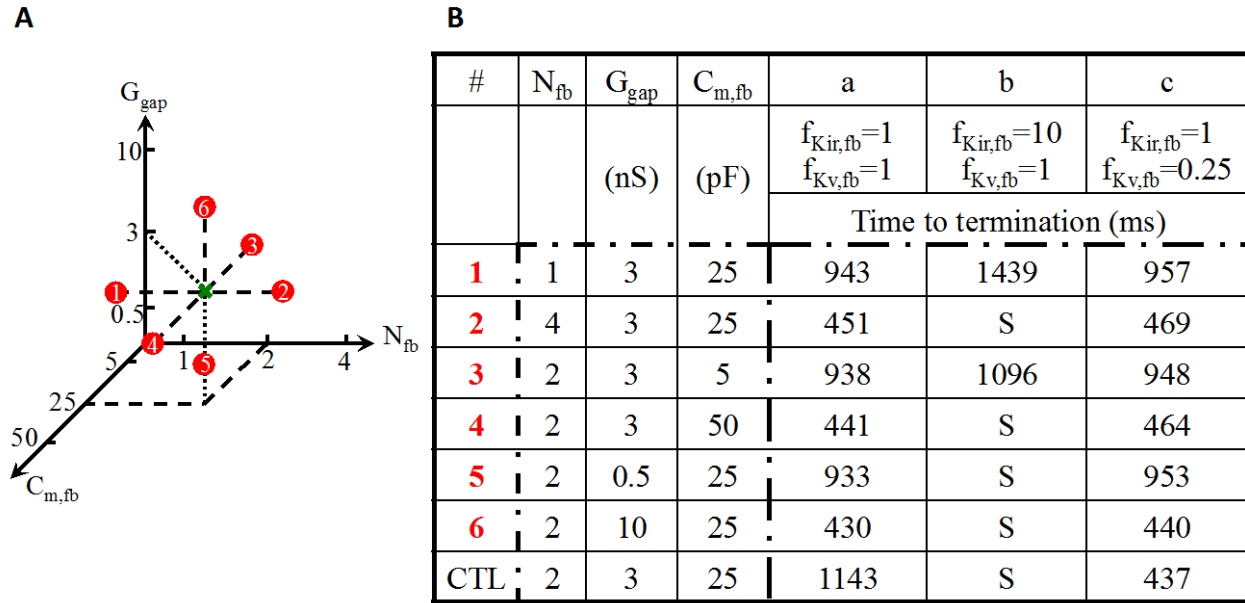

**Supplemental Figure 10.** Effect of varying the number of fibroblasts per cardiomyocyte ( $N_{fb}$ ), gap junction conductance ( $G_{gap}$ ) and fibroblast capacitance ( $C_{m,fb}$ ) on spiral-wave dynamics for non-remodeled (a), proarrhythmic (b) and antiarrhythmic (c) conditions. (A) Parameter-space of  $N_{fb}$ ,  $G_{gap}$  and  $C_{m,fb}$ ; the green X represents the default parameter-set used for all simulations in the paper, while the red dots indicate the variations indicated by the red numbers in the table in B. (B) Decreasing  $N_{fb}$  attenuated the proarrhythmic effect of  $I_{K_{ir,fb}}$ -upregulation (#1b vs. CTLb) and antiarrhythmic effect of  $I_{K_{v,fb}}$ -downregulation (#1c vs. CTLc). Increasing the  $N_{fb}$  (#2) did not have clear effects. Reducing fibroblast-capacitance ( $C_{m,fb}$ ) greatly attenuated effects of fibroblast ion-channel remodeling (#3b and #3c barely changed vs. #3a). Increasing  $C_{m,fb}$  (#4) reduced baseline AF-persistence (#4a vs. CTLa) but did not appreciably alter persistence with remodeling (#4b and #4c vs. CTLb and CTLc respectively). Reducing  $G_{gap}$  reduced baseline rotor-persistence (#5a vs. CTLa) and virtually eliminated the effects of  $I_{K_{v,fb}}$ -downregulation (#5c barely changed vs. #5a), but AF remained sustained with  $I_{K_{ir,fb}}$ -upregulation (#5b). Increasing  $G_{gap}$  did not appreciably alter the effects of ionic remodeling (#6b and #6c vs. CTLb and CTLc respectively).

Supplemental Table 1: Experimental single cell APD<sub>90</sub> and ERP and matched simulated single cell APD<sub>90</sub>.

|                                                                 | CTL<br>(ms) | HF<br>(ms) |
|-----------------------------------------------------------------|-------------|------------|
| Experimental<br>(Li et al., <i>Circulation</i> . 101:2631-2638) |             |            |
| APD <sub>90</sub> at 3Hz                                        | 138         | 145        |
| Simulated                                                       |             |            |
| APD <sub>90</sub> at 3Hz                                        | 139         | 148        |

Supplemental Table 2: Experimental and simulated ERP for control and remodeled conditions with and without fibroblasts.

|             | Experimental |     | Simulated |       |                  |                 |                 |                |
|-------------|--------------|-----|-----------|-------|------------------|-----------------|-----------------|----------------|
|             | CTL          | HF  | CM CTL    | CM HF | CM CTL<br>FB CTL | CM CTL<br>FB HF | CM HF<br>FB CTL | CM HF<br>FB HF |
| FB/CM       | -            | -   | 0         | 0     | 2                | 2               | 2               | 2              |
| ERP<br>(ms) | 131          | 149 | 144       | 188   | 164              | 171             | 189             | 196            |

We implemented the HF-induced cardiomyocyte ionic and capacitance remodeling as described by Li et al. (*Circulation* (2000) 101:2631-2638) into the single-cell model and adjusted the mathematical model to match experimental APD<sub>90</sub> (Supplemental Table 1). We then used these single-cell parameters in the 2D-model to compare the experimental control (CTL) and HF-remodeled (HF) ERP to the ERP computed in the model for the CTL and HF cardiomyocyte with and without fibroblasts. The mathematical model was able to qualitatively reproduce the experimentally observed ERP prolongation in HF. Introducing fibroblasts had either no effect on ERP (CM-HF+CTL fibroblast currents/capacitance versus CM-HF) or prolonged ERP (CM-HF+HF fibroblast currents/capacitance versus CM-HF).
